# Supplementary material
Source: ML conference proceedings conference paper supplement (https://www.ecva.net/papers/eccv_2022/papers_ECCV/html/136720346_ECCV_2022_paper.php)
Supplement: Supplementary file 2 [file 136720346-supp.zip]

# User Study

Since the AMT does not allow to export the questionnaire to pdf file. Here we present a sample questionnaire consisted of instructions, questions, images and answers from questionnaires used in AMT.

In this survey, you will answer 60 questions with an unlimited time for the response. No personal data is collected.

Three Artificial Intelligence (AI) systems are trained to classify car models or to recognize bird species. For this purpose, each system points out the visual features that are considered salient in its opinion. A salient feature is a characteristic attribute distinguishing one object from another.

You will see images of cars and birds together with a feature pointed out by a system. The feature is marked by a colormap where red regions correspond to the feature, and blue indicates unrelated regions.

Your task is to answer the following question: "How salient is the feature pointed out by the AI system?", choosing a value from 1 ("the least salient") to 5 ("the most salient").

Below, we present an example of the question.

---

**\*Required**

1. How salient is the feature pointed out by the AI system?

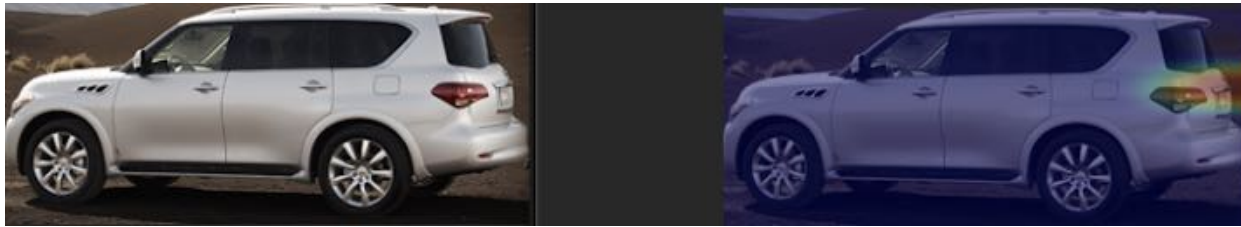

*Mark only one oval.*

☐ 1 - (least salient)

☐ 2

☐ 3

☐ 4

☐ 5 - (most salient)

Birds

2. How salient is the feature pointed out by the AI system? \*

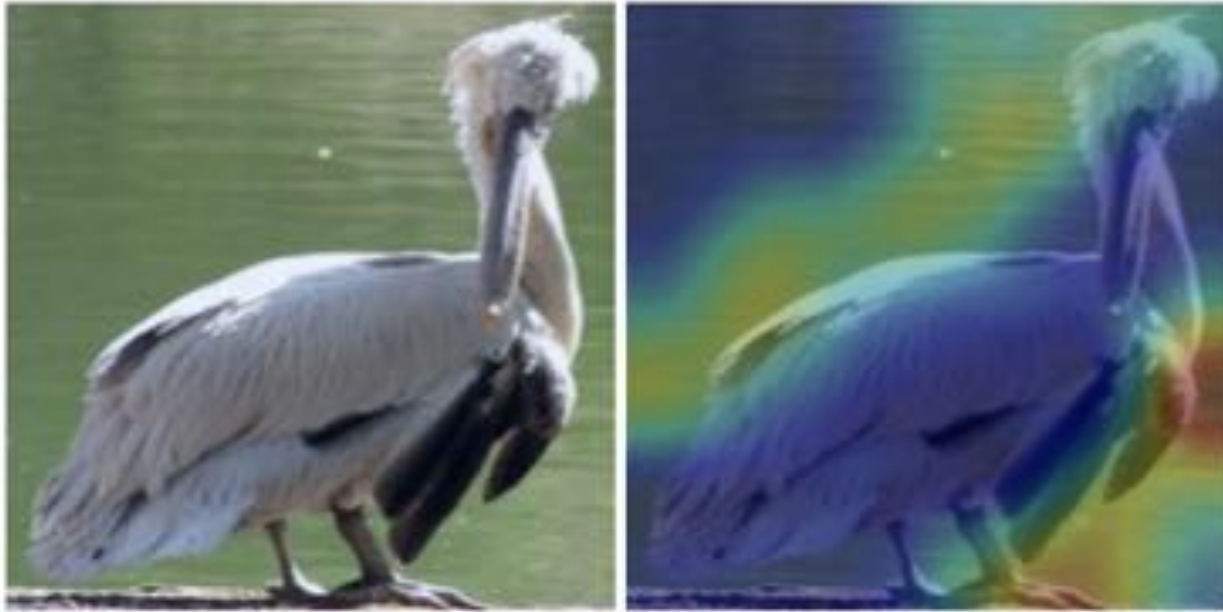

*Mark only one oval.*

- ☐ 1 - (least salient)
- ☐ 2
- ☐ 3
- ☐ 4
- ☐ 5 - (most salient)

3. How salient is the feature pointed out by the AI system? \*

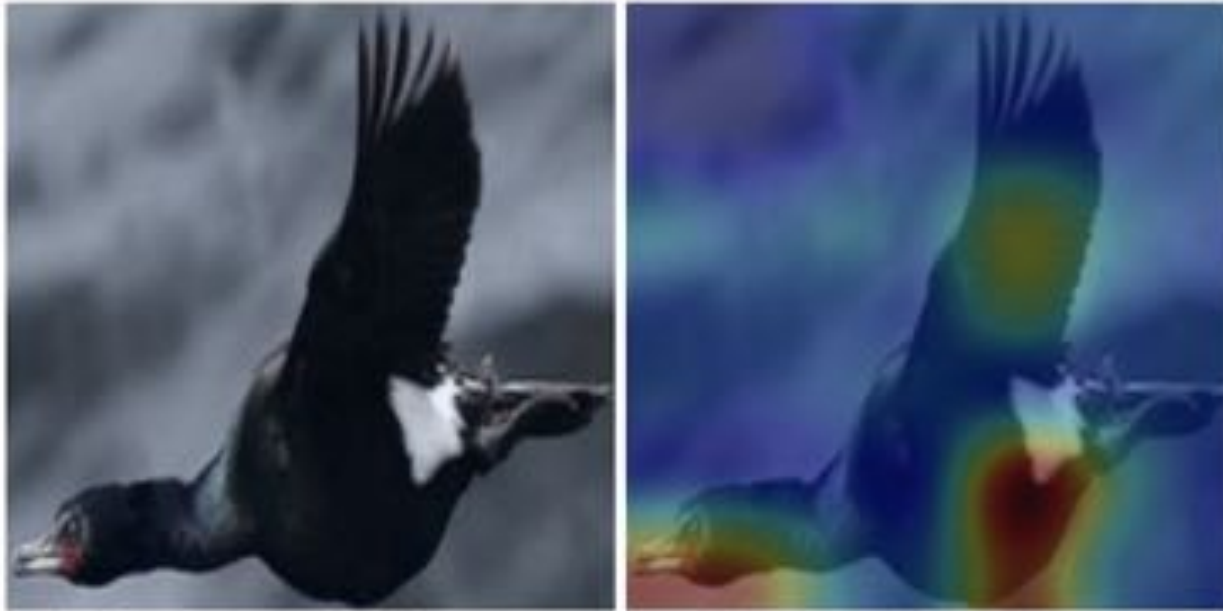

*Mark only one oval.*

- ☐ 1 - (least salient)
- ☐ 2
- ☐ 3
- ☐ 4
- ☐ 5 - (most salient)

4. How salient is the feature pointed out by the AI system? \*

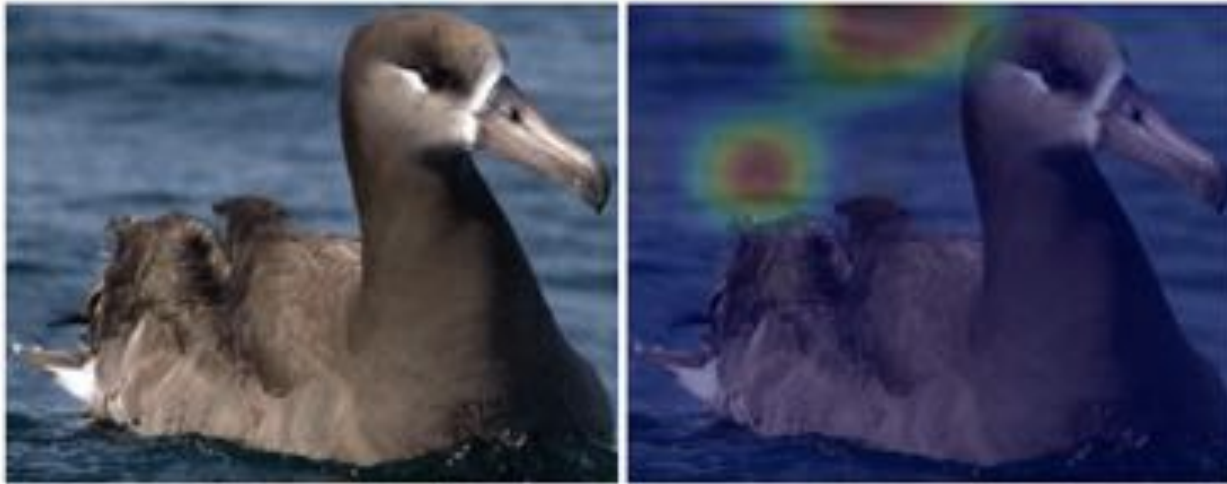

*Mark only one oval.*

- ☐ 1 - (least salient)
- ☐ 2
- ☐ 3
- ☐ 4
- ☐ 5 - (most salient)

5. How salient is the feature pointed out by the AI system? \*

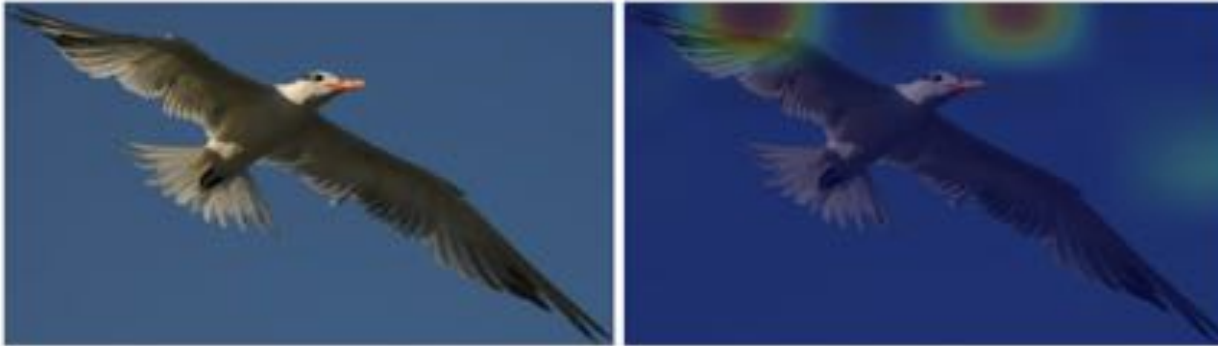

*Mark only one oval.*

- ☐ 1 - (least salient)
- ☐ 2
- ☐ 3
- ☐ 4
- ☐ 5 - (most salient)

6. How salient is the feature pointed out by the AI system? \*

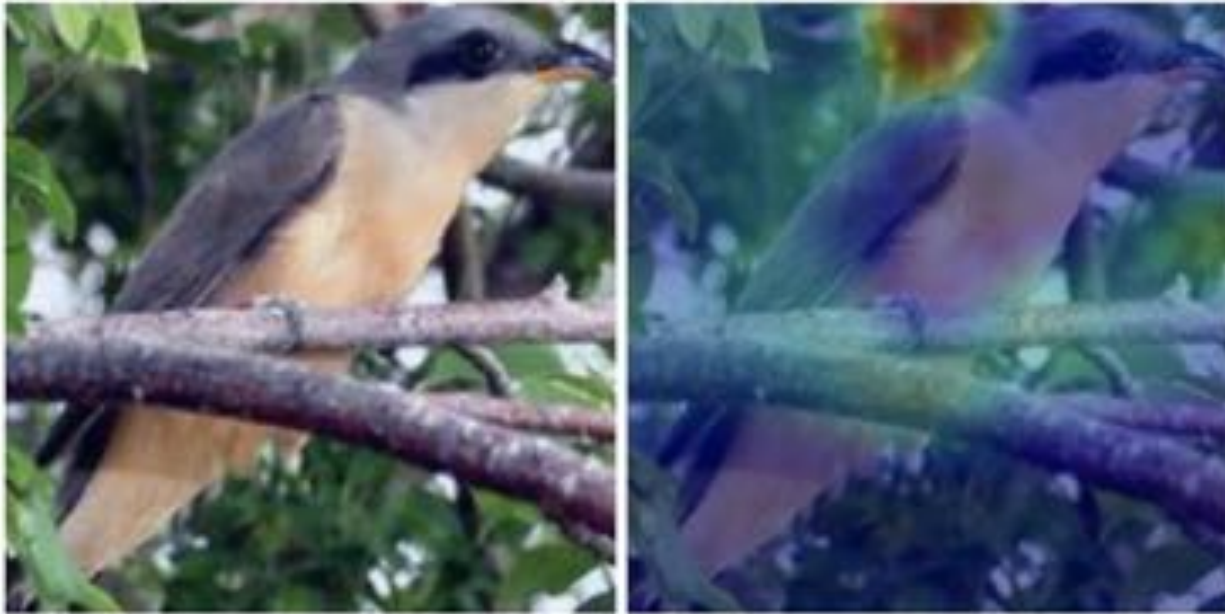

*Mark only one oval.*

- ☐ 1 - (least salient)
- ☐ 2
- ☐ 3
- ☐ 4
- ☐ 5 - (most salient)

7. How salient is the feature pointed out by the AI system? \*

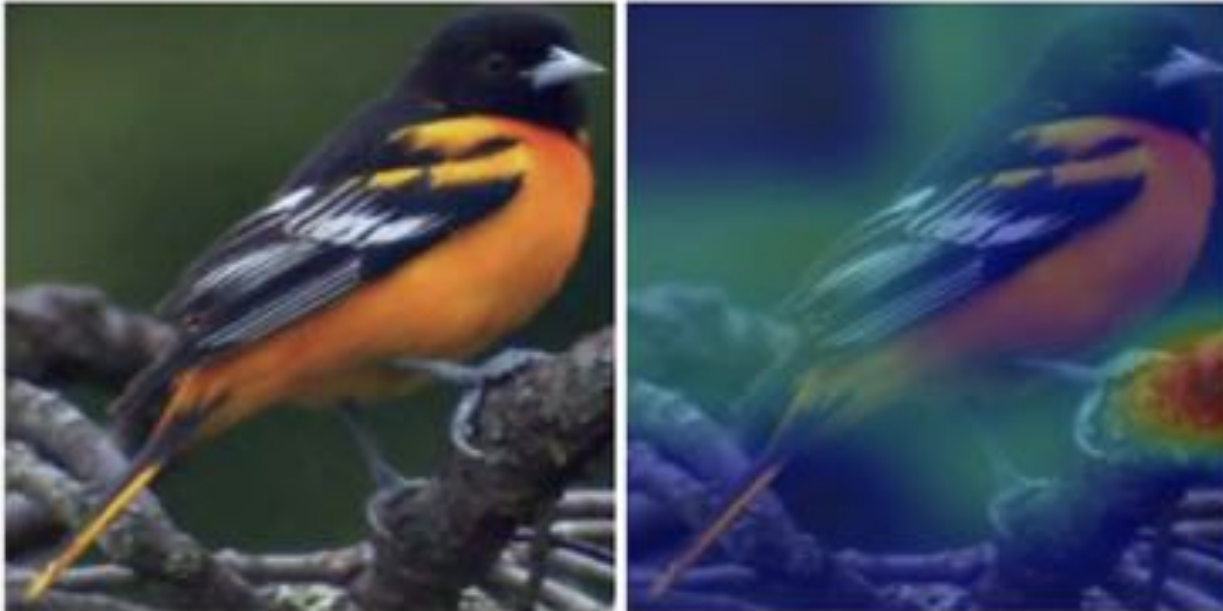

*Mark only one oval.*

- ☐ 1 - (least salient)
- ☐ 2
- ☐ 3
- ☐ 4
- ☐ 5 - (most salient)



8. How salient is the feature pointed out by the AI system? \*

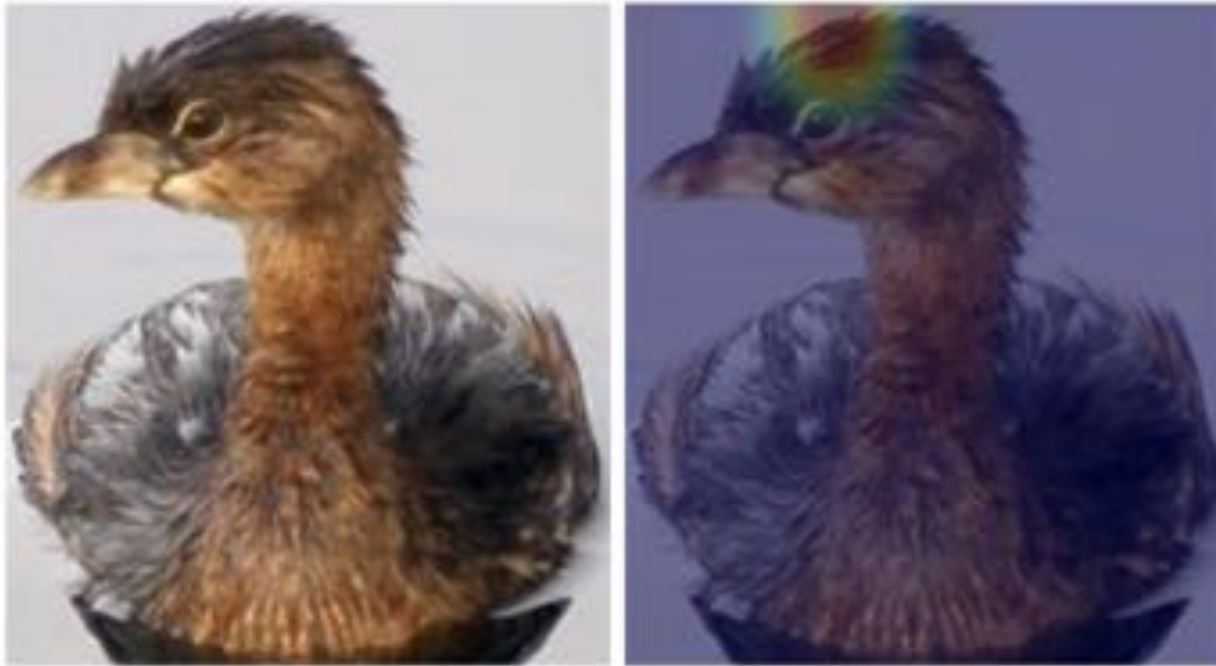

*Mark only one oval.*

- ☐ 1 - (least salient)
- ☐ 2
- ☐ 3
- ☐ 4
- ☐ 5 - (most salient)

9. How salient is the feature pointed out by the AI system? \*

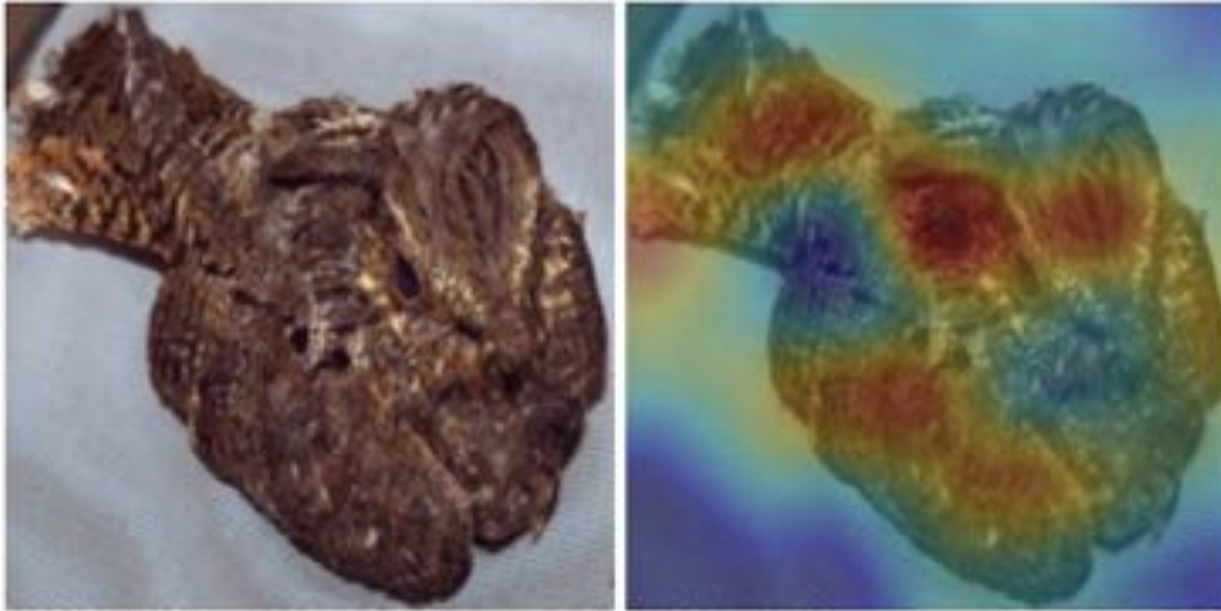

*Mark only one oval.*

- ☐ 1 - (least salient)
- ☐ 2
- ☐ 3
- ☐ 4
- ☐ 5 - (most salient)

10. How salient is the feature pointed out by the AI system? \*

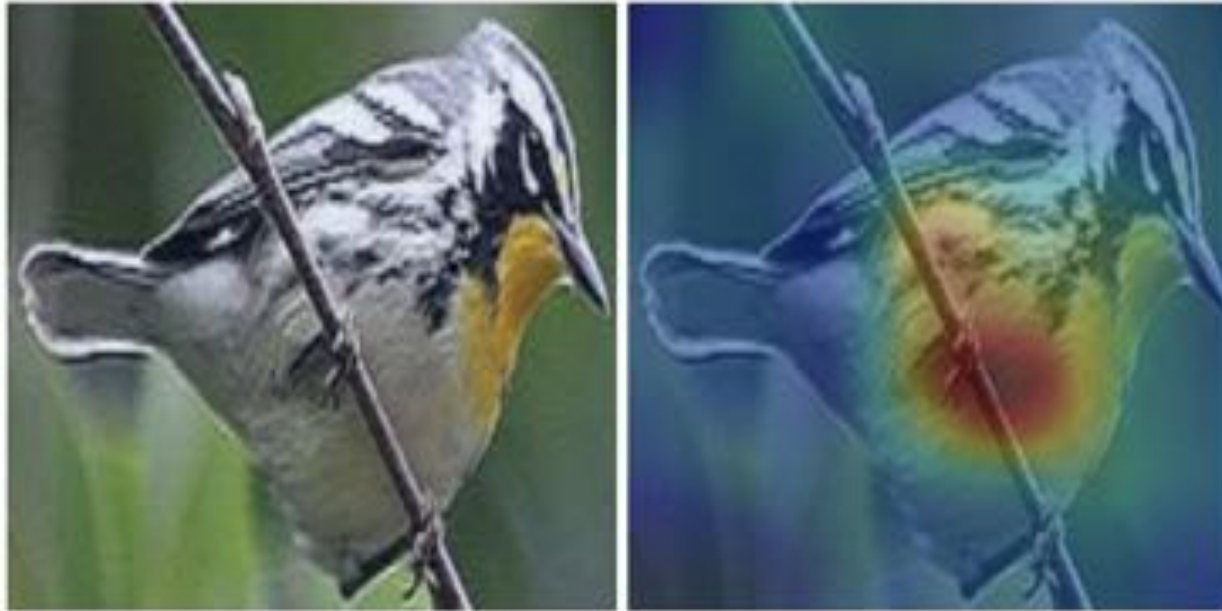

*Mark only one oval.*

- ☐ 1 - (least salient)
- ☐ 2
- ☐ 3
- ☐ 4
- ☐ 5 - (most salient)

11. How salient is the feature pointed out by the AI system? \*

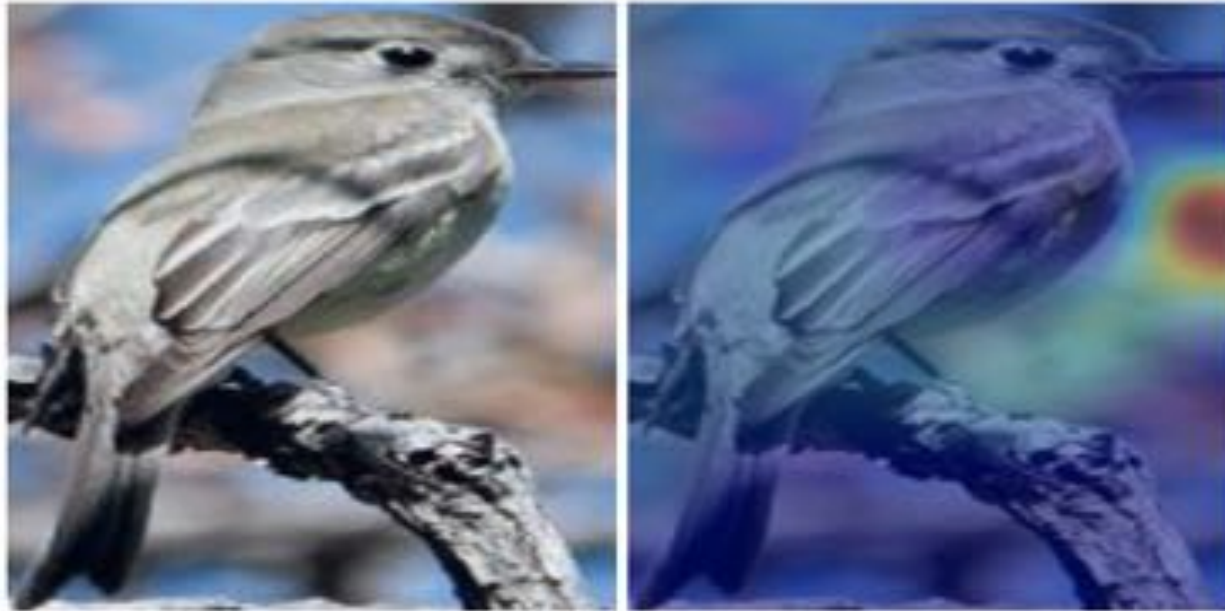

*Mark only one oval.*

- ☐ 1 - (least salient)
- ☐ 2
- ☐ 3
- ☐ 4
- ☐ 5 - (most salient)

12. How salient is the feature pointed out by the AI system? \*

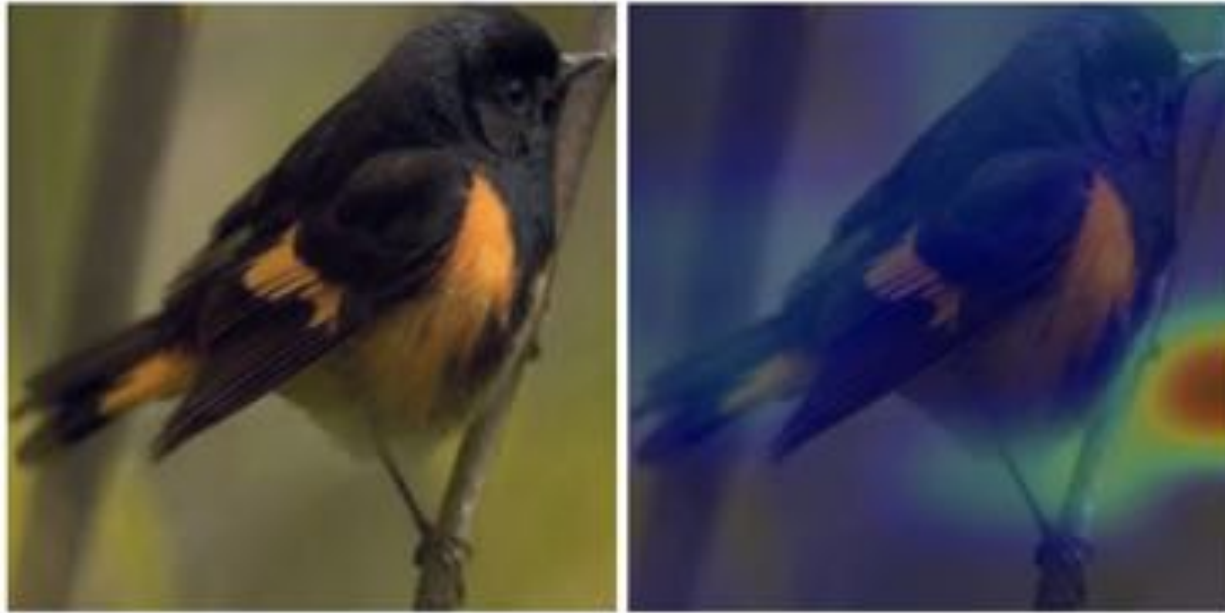

*Mark only one oval.*

- ☐ 1 - (least salient)
- ☐ 2
- ☐ 3
- ☐ 4
- ☐ 5 - (most salient)

13. How salient is the feature pointed out by the AI system? \*

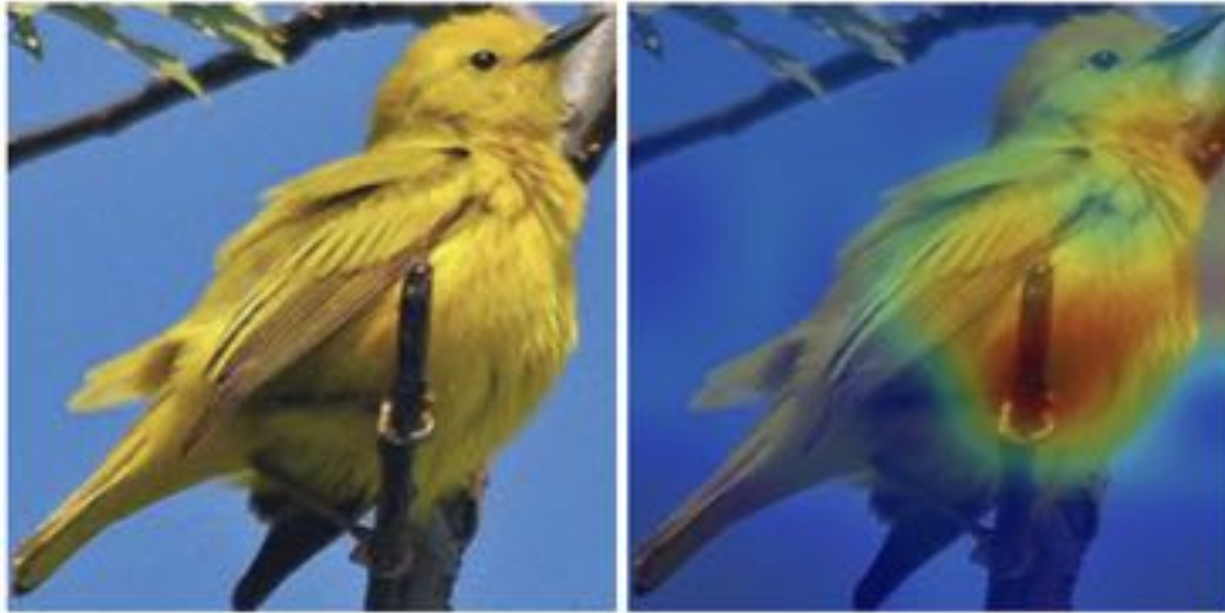

*Mark only one oval.*

- ☐ 1 - (least salient)
- ☐ 2
- ☐ 3
- ☐ 4
- ☐ 5 - (most salient)



14. How salient is the feature pointed out by the AI system? \*

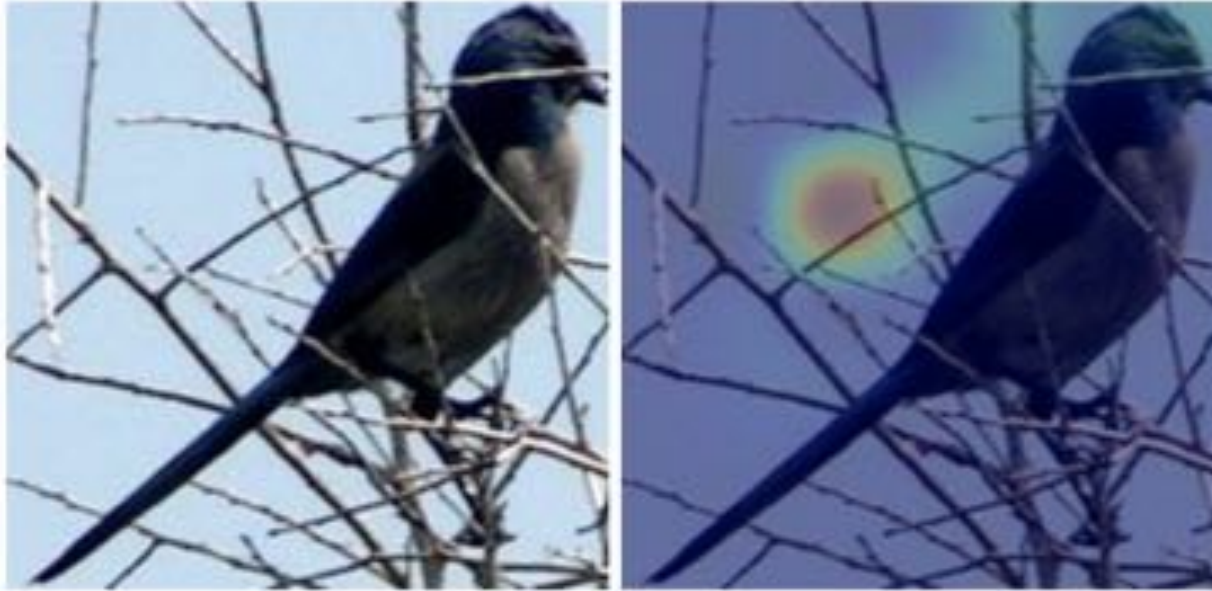

*Mark only one oval.*

- ☐ 1 - (least salient)
- ☐ 2
- ☐ 3
- ☐ 4
- ☐ 5 - (most salient)

15. How salient is the feature pointed out by the AI system? \*

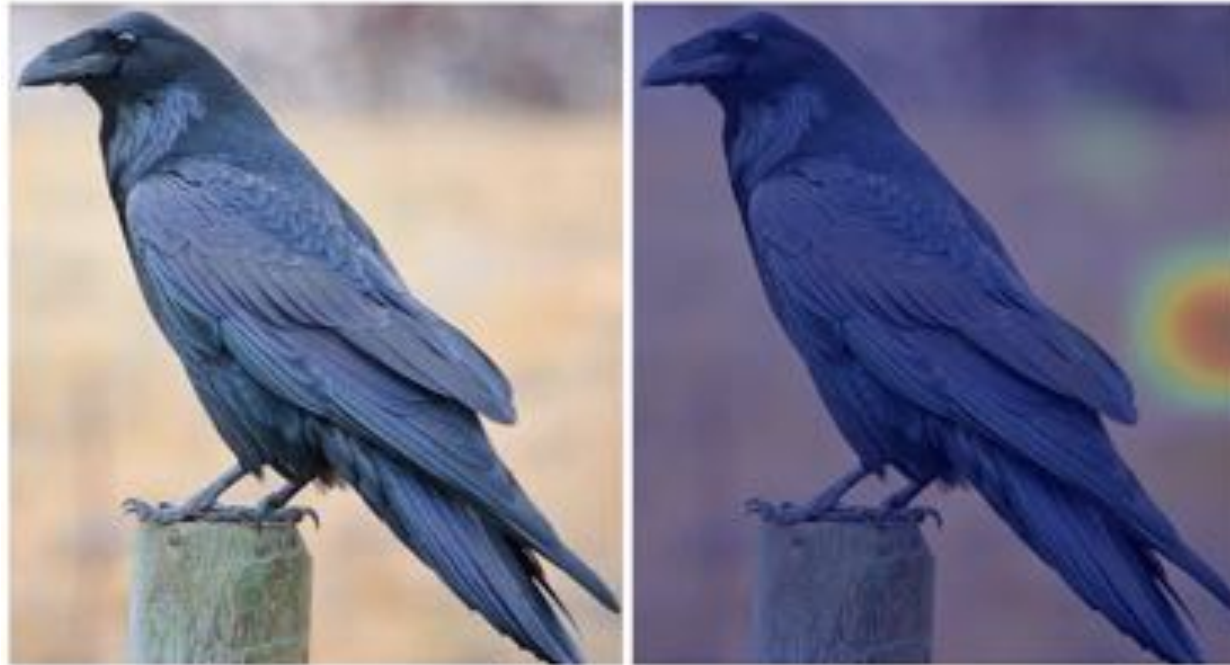

*Mark only one oval.*

- ☐ 1 - (least salient)
- ☐ 2
- ☐ 3
- ☐ 4
- ☐ 5 - (most salient)



16. How salient is the feature pointed out by the AI system? \*

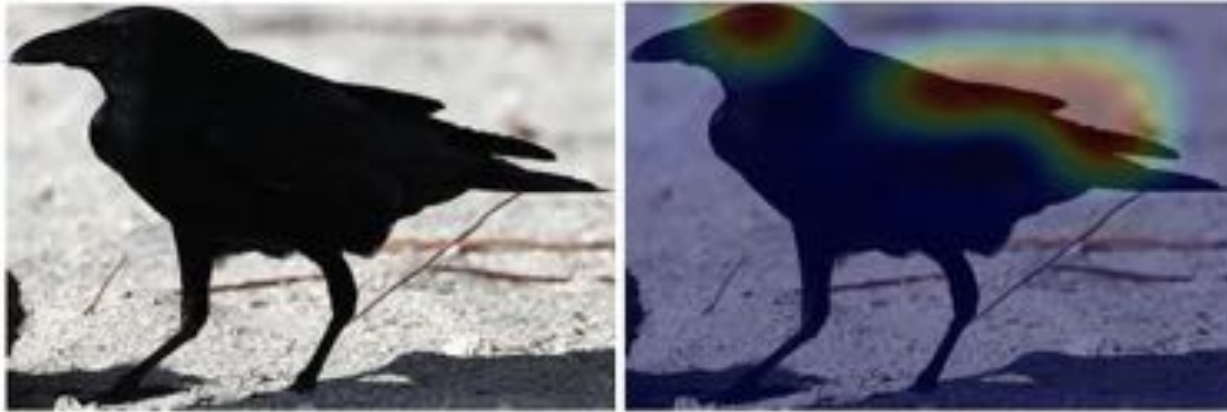

*Mark only one oval.*

- ☐ 1 - (least salient)
- ☐ 2
- ☐ 3
- ☐ 4
- ☐ 5 - (most salient)

17. How salient is the feature pointed out by the AI system? \*

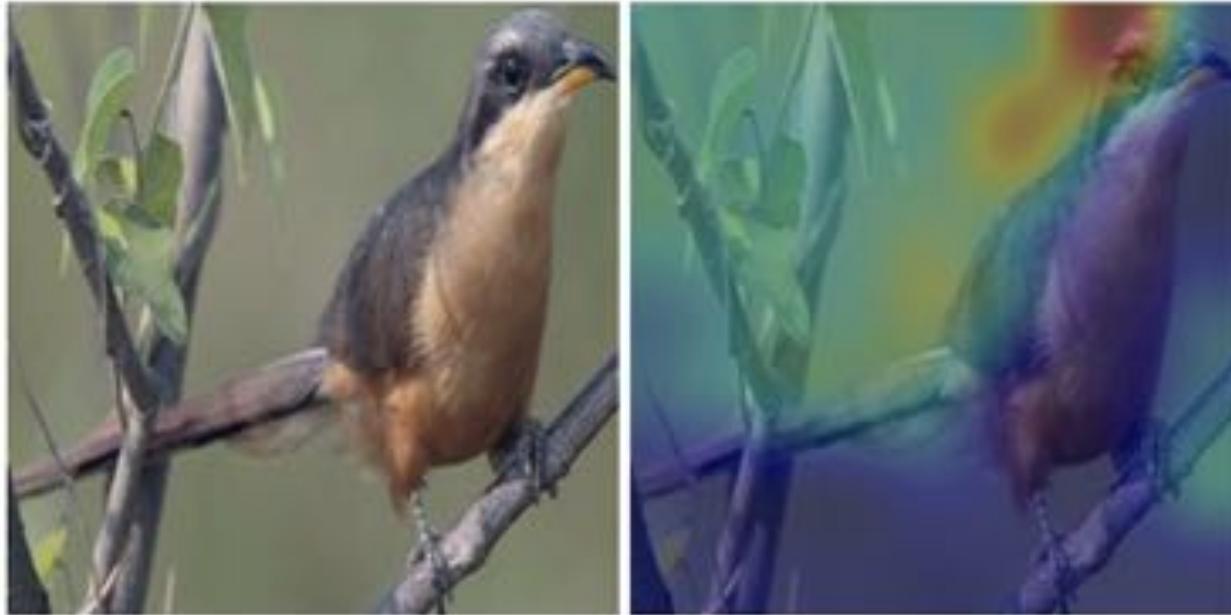

*Mark only one oval.*

- ☐ 1 - (least salient)
- ☐ 2
- ☐ 3
- ☐ 4
- ☐ 5 - (most salient)

18. How salient is the feature pointed out by the AI system? \*

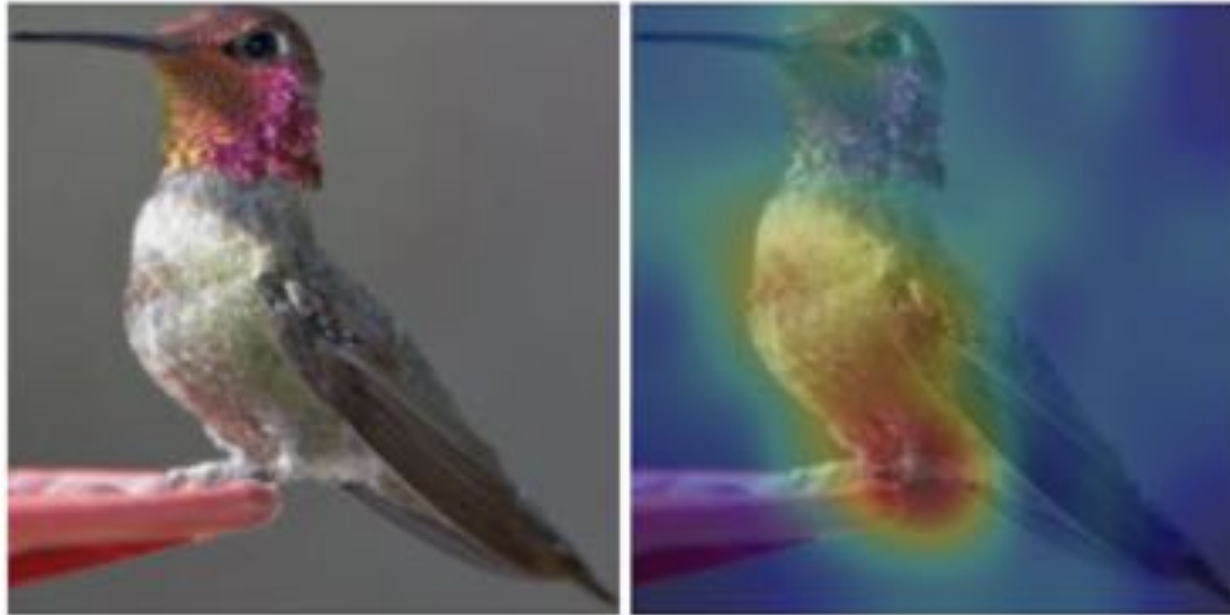

*Mark only one oval.*

- ☐ 1 - (least salient)
- ☐ 2
- ☐ 3
- ☐ 4
- ☐ 5 - (most salient)

19. How salient is the feature pointed out by the AI system? \*

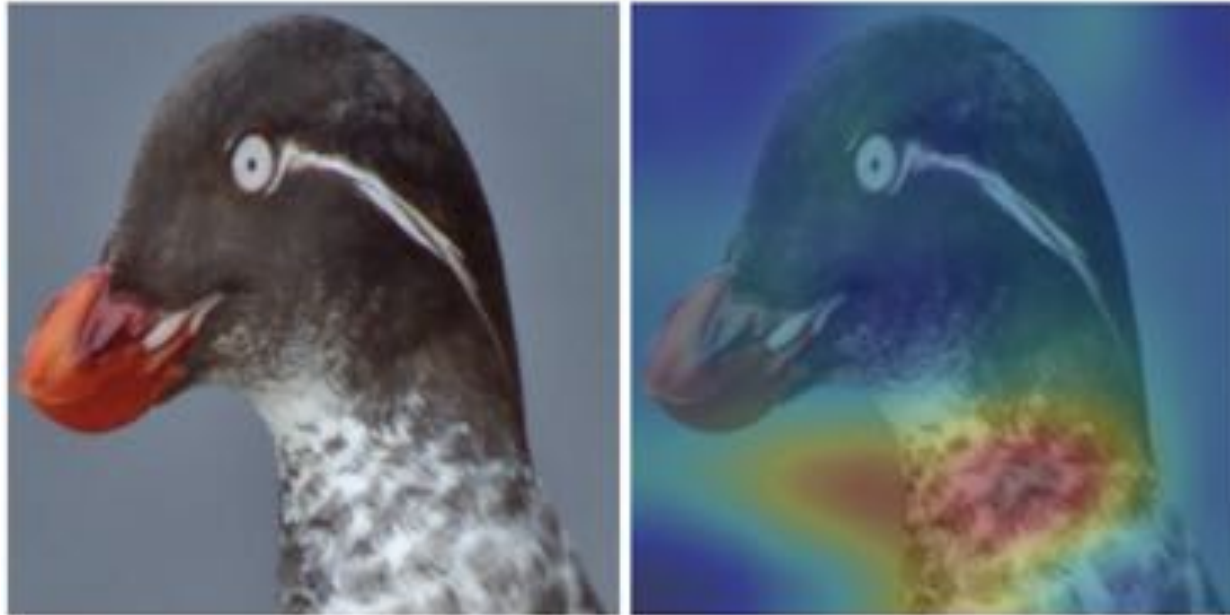

*Mark only one oval.*

- ☐ 1 - (least salient)
- ☐ 2
- ☐ 3
- ☐ 4
- ☐ 5 - (most salient)

20. How salient is the feature pointed out by the AI system? \*

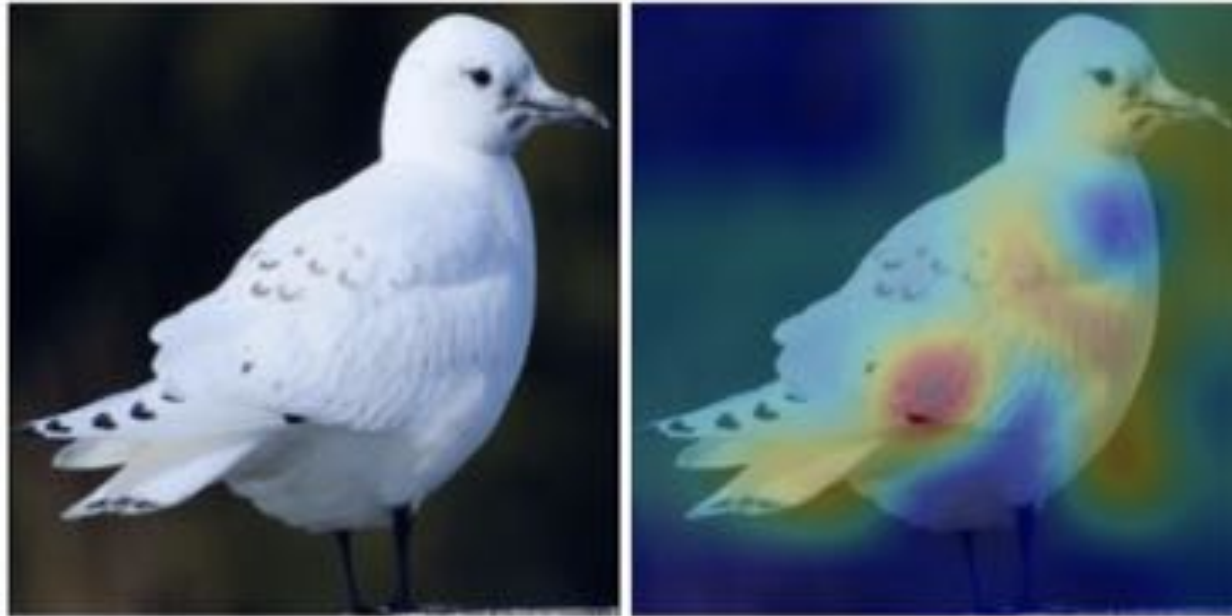

Mark only one oval.

- ☐ 1 - (least salient)
- ☐ 2
- ☐ 3
- ☐ 4
- ☐ 5 - (most salient)

21. How salient is the feature pointed out by the AI system? \*

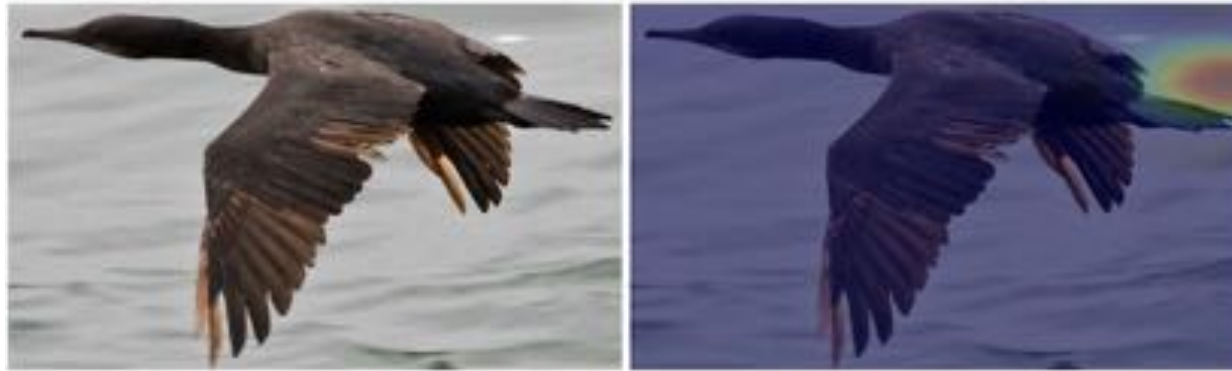

*Mark only one oval.*

- ☐ 1 - (least salient)
- ☐ 2
- ☐ 3
- ☐ 4
- ☐ 5 - (most salient)

22. How salient is the feature pointed out by the AI system? \*

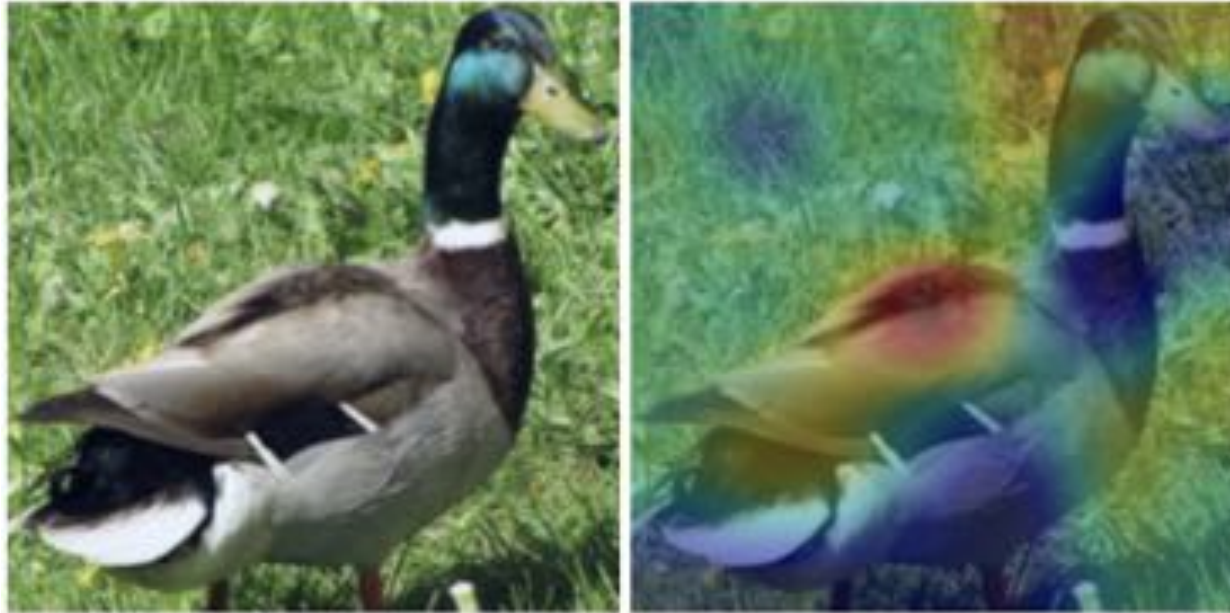

*Mark only one oval.*

- ☐ 1 - (least salient)
- ☐ 2
- ☐ 3
- ☐ 4
- ☐ 5 - (most salient)

23. How salient is the feature pointed out by the AI system? \*

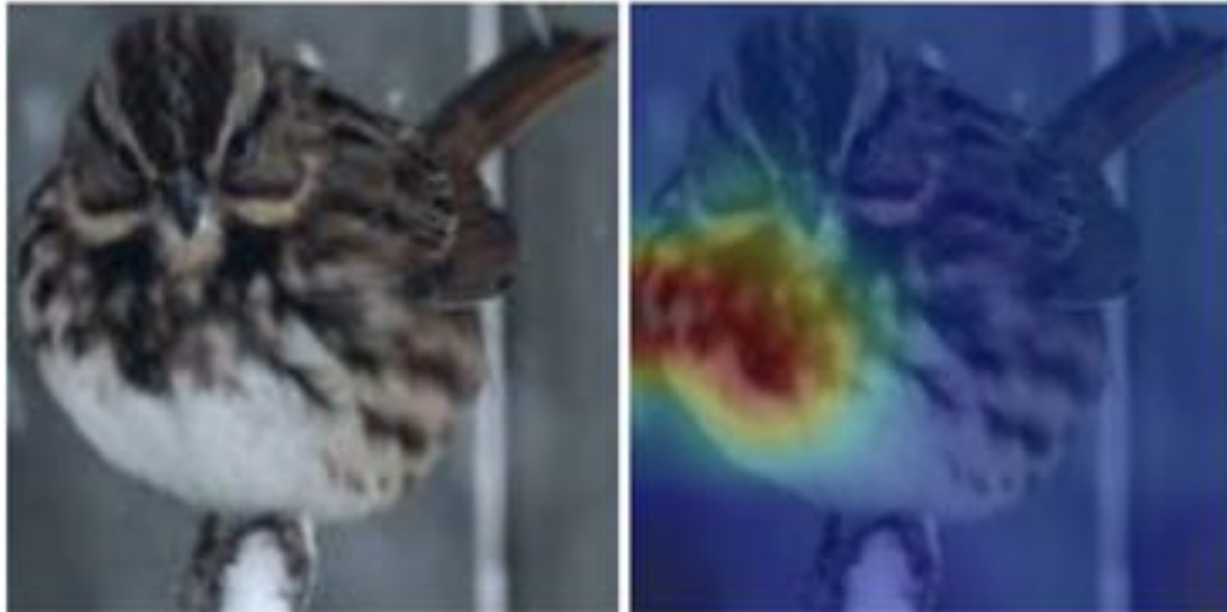

Mark only one oval.

☐ 1 - (least salient)

☐ 2

☐ 3

☐ 4

☐ 5 - (most salient)

☐ Other: \_\_\_\_\_



24. How salient is the feature pointed out by the AI system? \*

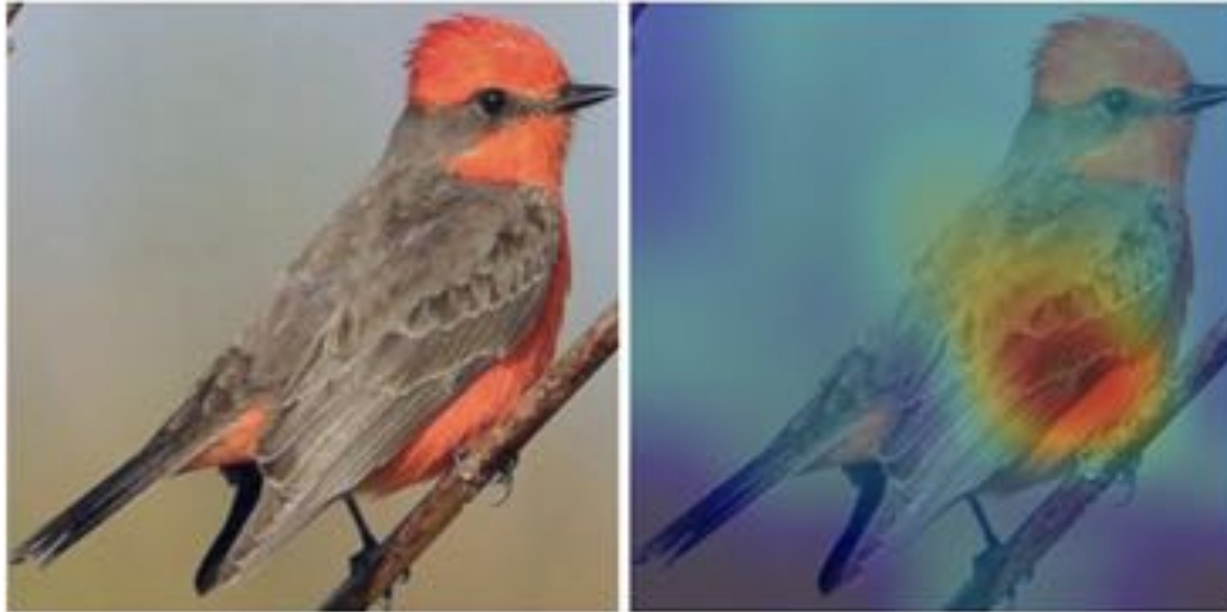

Mark only one oval.

- ☐ 1 - (least salient)
- ☐ 2
- ☐ 3
- ☐ 4
- ☐ 5 - (most salient)

25. How salient is the feature pointed out by the AI system? \*

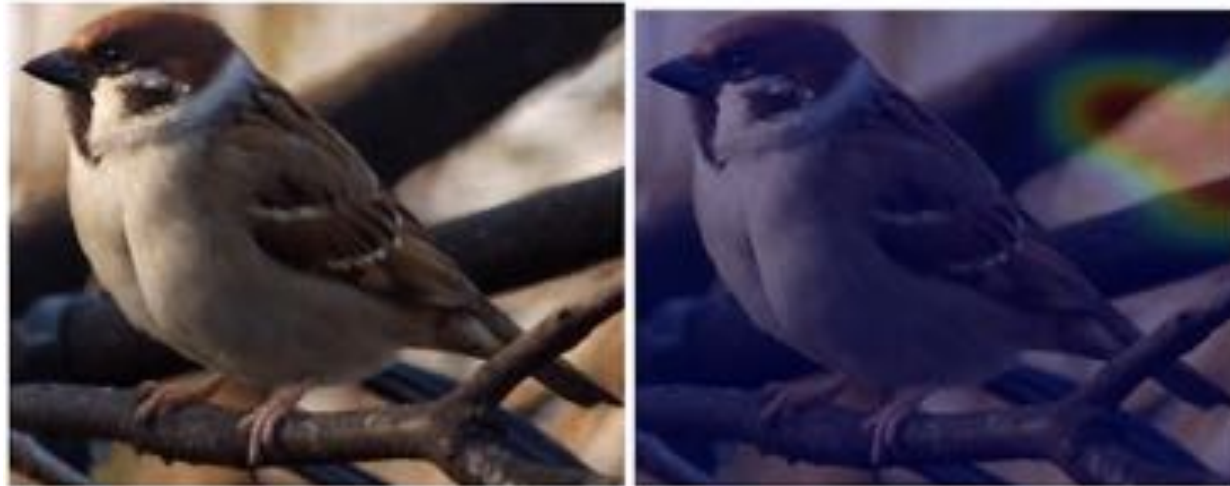

*Mark only one oval.*

- ☐ 1 - (least salient)
- ☐ 2
- ☐ 3
- ☐ 4
- ☐ 5 - (most salient)

26. How salient is the feature pointed out by the AI system? \*

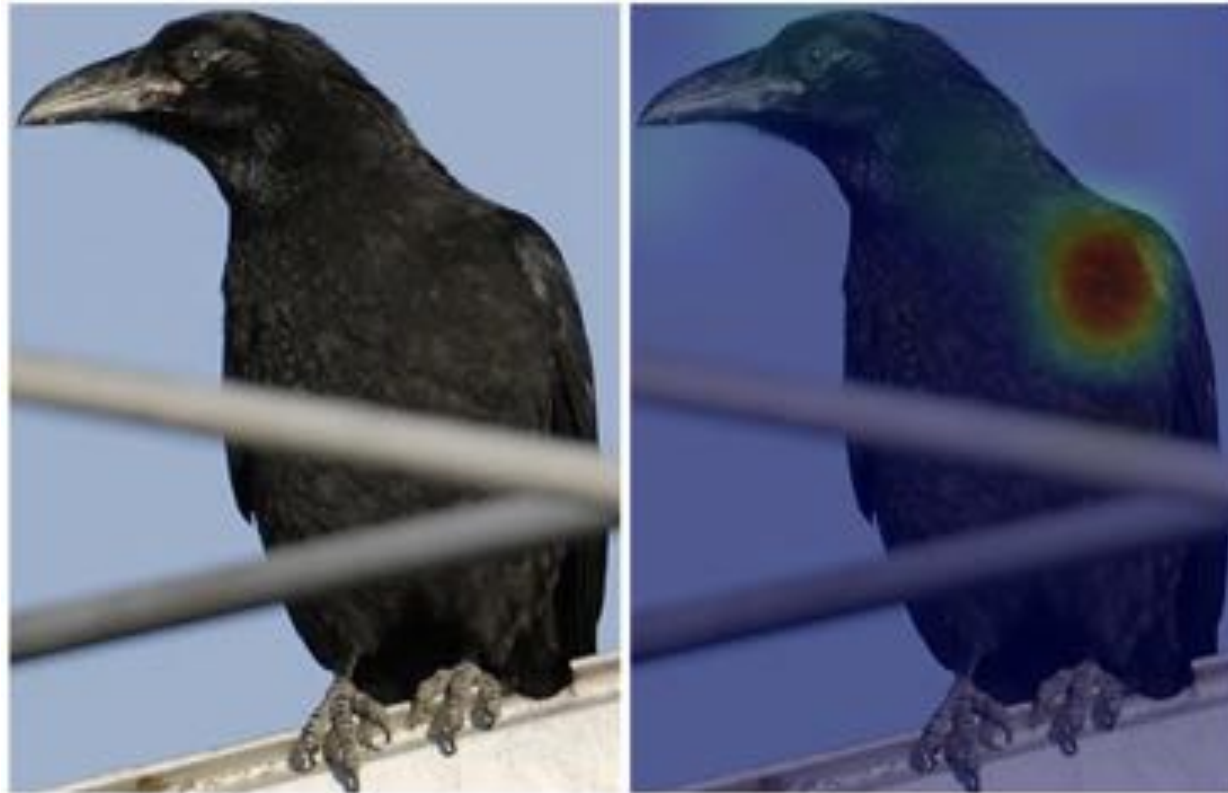

*Mark only one oval.*

- ☐ 1 - (least salient)
- ☐ 2
- ☐ 3
- ☐ 4
- ☐ 5 - (most salient)

27. How salient is the feature pointed out by the AI system? \*

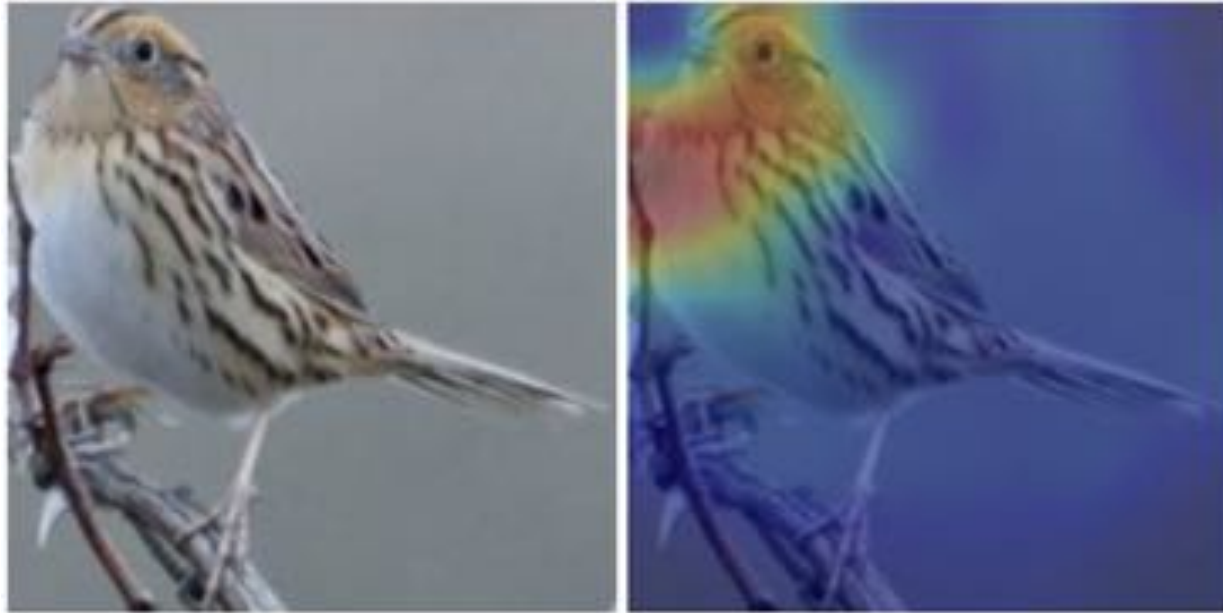

*Mark only one oval.*

- ☐ 1 - (least salient)
- ☐ 2
- ☐ 3
- ☐ 4
- ☐ 5 - (most salient)

28. How salient is the feature pointed out by the AI system? \*

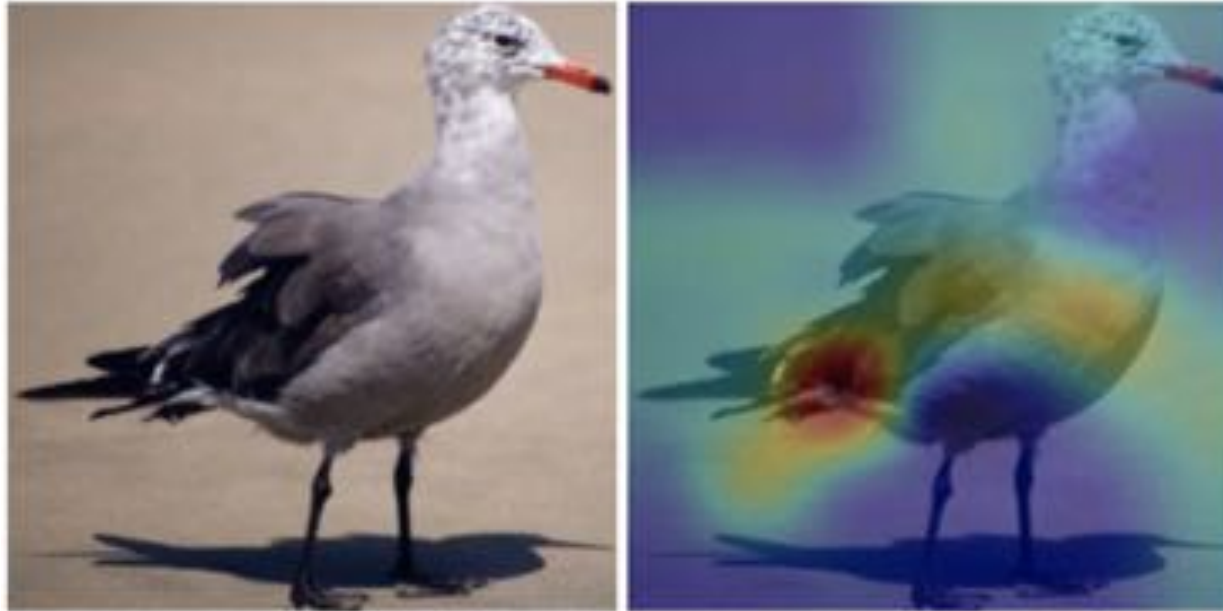

*Mark only one oval.*

- ☐ 1 - (least salient)
- ☐ 2
- ☐ 3
- ☐ 4
- ☐ 5 - (most salient)

29. How salient is the feature pointed out by the AI system? \*

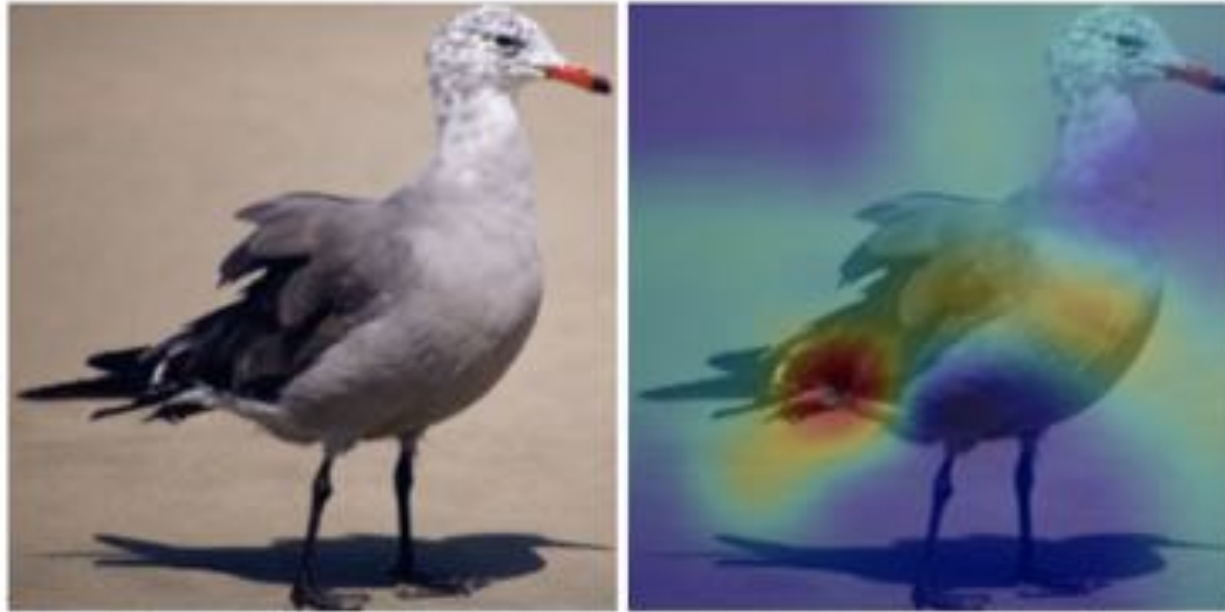

*Mark only one oval.*

- ☐ 1 - (least salient)
- ☐ 2
- ☐ 3
- ☐ 4
- ☐ 5 - (most salient)

30. How salient is the feature pointed out by the AI system? \*

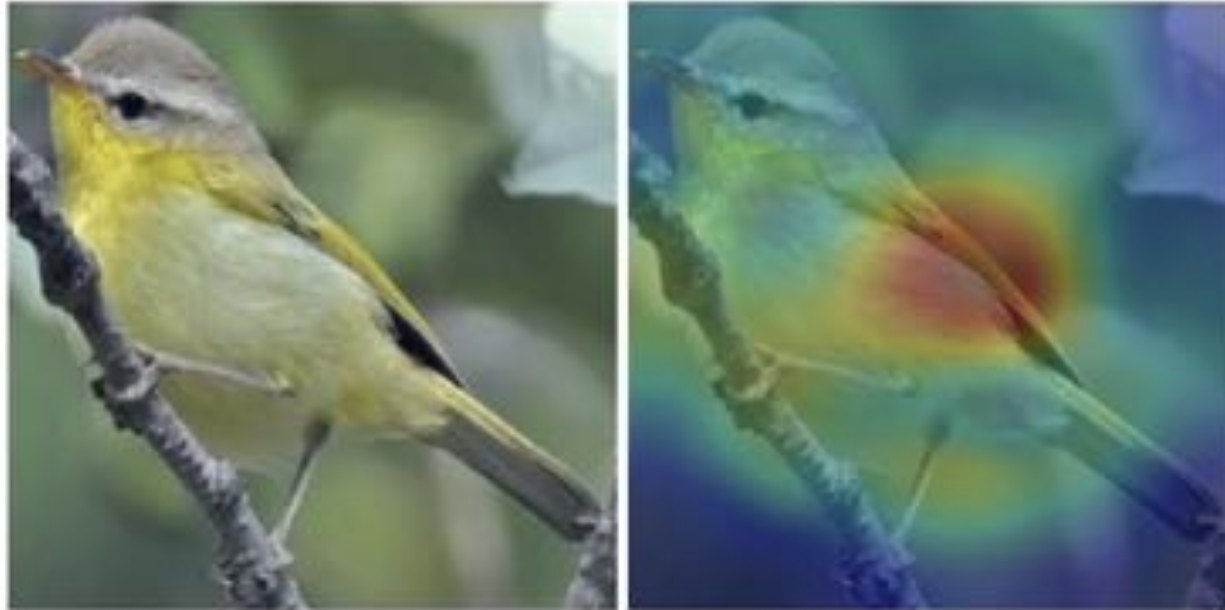

*Mark only one oval.*

- ☐ 1 - (least salient)
- ☐ 2
- ☐ 3
- ☐ 4
- ☐ 5 - (most salient)

31. How salient is the feature pointed out by the AI system? \*

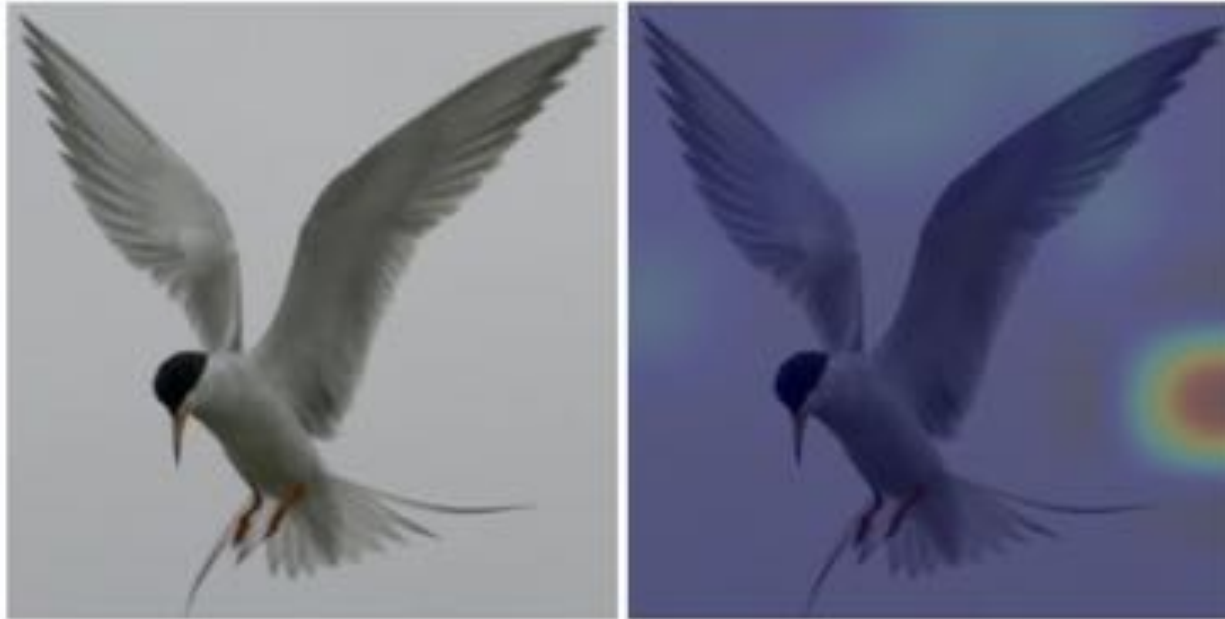

Mark only one oval.

- ☐ 1 - (least salient)
- ☐ 2
- ☐ 3
- ☐ 4
- ☐ 5 - (most salient)

Cars



32. How salient is the feature pointed out by the AI system? \*

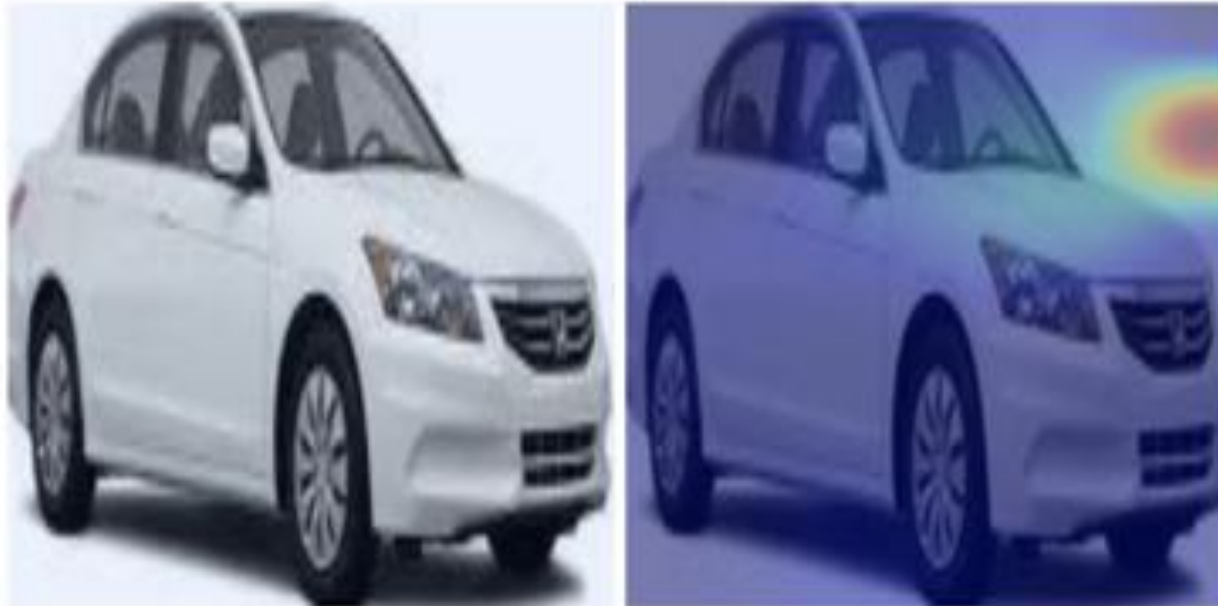

Mark only one oval.

- ☐ 1 - (least salient)
- ☐ 2
- ☐ 3
- ☐ 4
- ☐ 5 - (most salient)

33. How salient is the feature pointed out by the AI system? \*

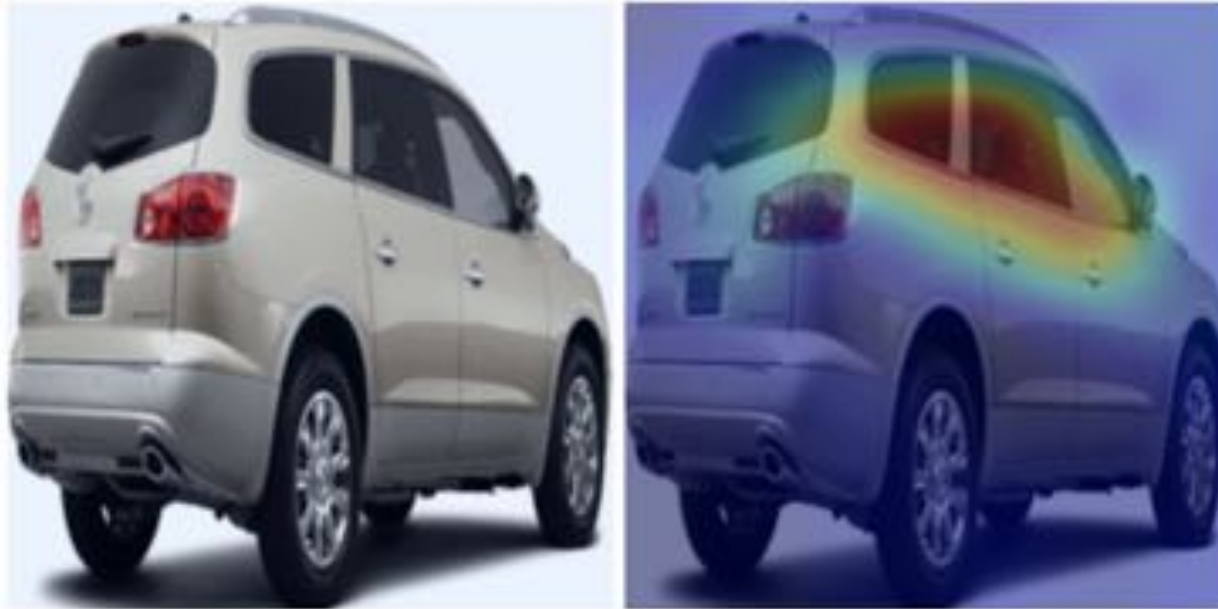

*Mark only one oval.*

- ☐ 1 - (least salient)
- ☐ 2
- ☐ 3
- ☐ 4
- ☐ 5 - (most salient)

34. How salient is the feature pointed out by the AI system? \*

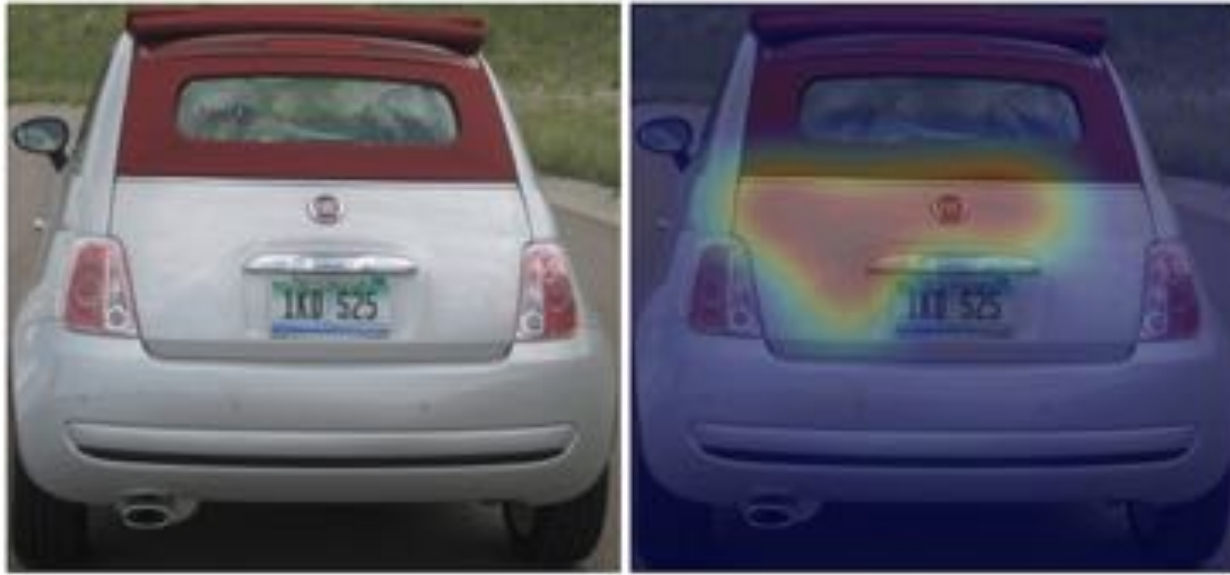

*Mark only one oval.*

- ☐ 1 - (least salient)
- ☐ 2
- ☐ 3
- ☐ 4
- ☐ 5 - (most salient)

35. How salient is the feature pointed out by the AI system? \*

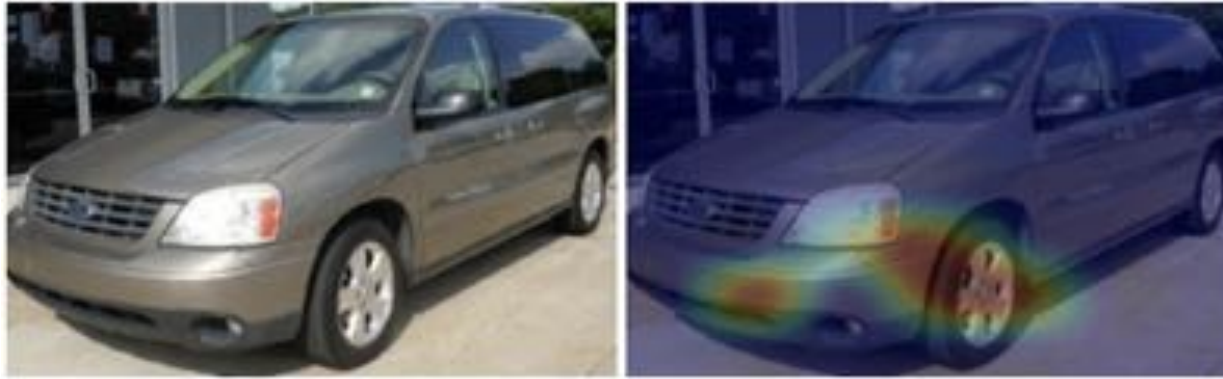

Mark only one oval.

- ☐ 1 - (least salient)
- ☐ 2
- ☐ 3
- ☐ 4
- ☐ 5 - (most salient)

36. How salient is the feature pointed out by the AI system? \*

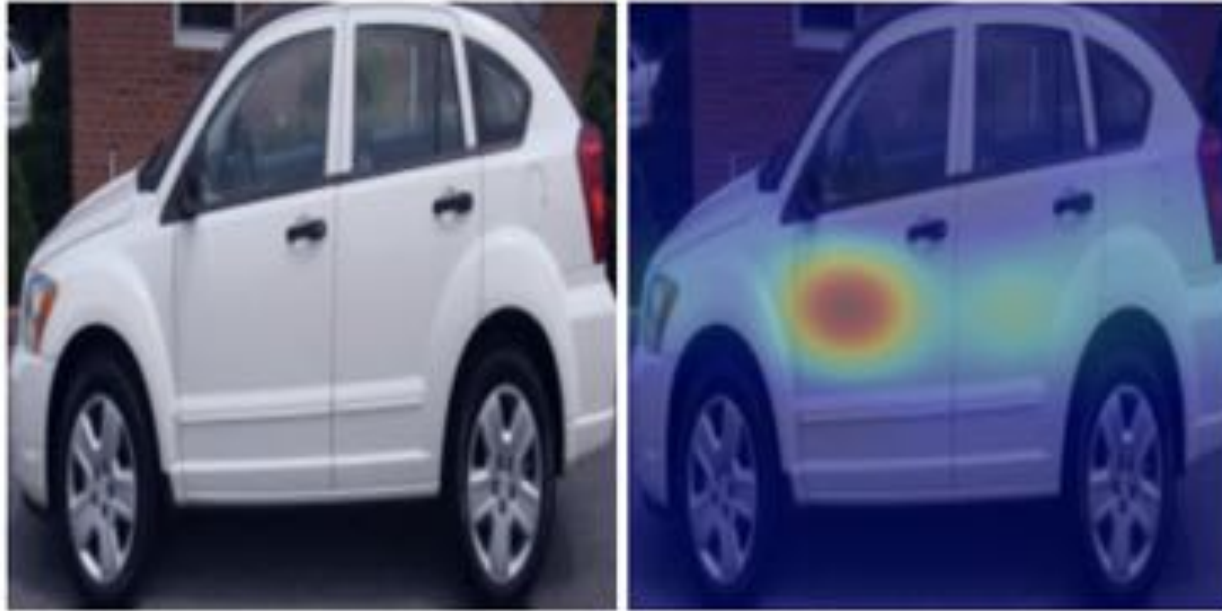

*Mark only one oval.*

- ☐ 1 - (least salient)
- ☐ 2
- ☐ 3
- ☐ 4
- ☐ 5 - (most salient)

37. How salient is the feature pointed out by the AI system? \*

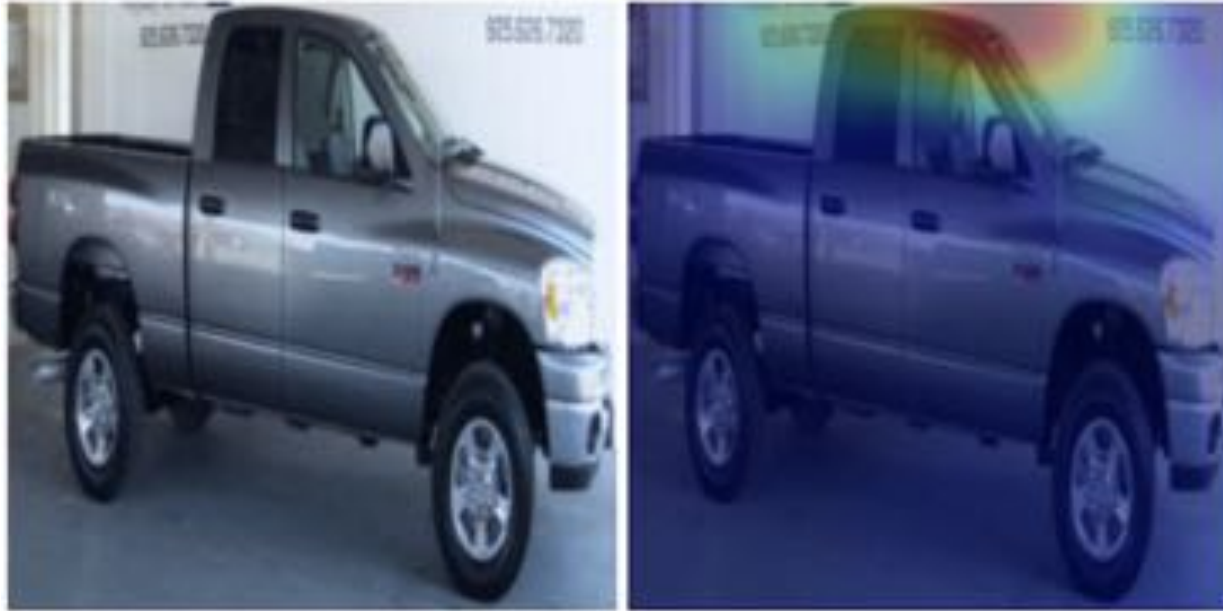

*Mark only one oval.*

- ☐ 1 - (least salient)
- ☐ 2
- ☐ 3
- ☐ 4
- ☐ 5 - (most salient)

38. How salient is the feature pointed out by the AI system? \*

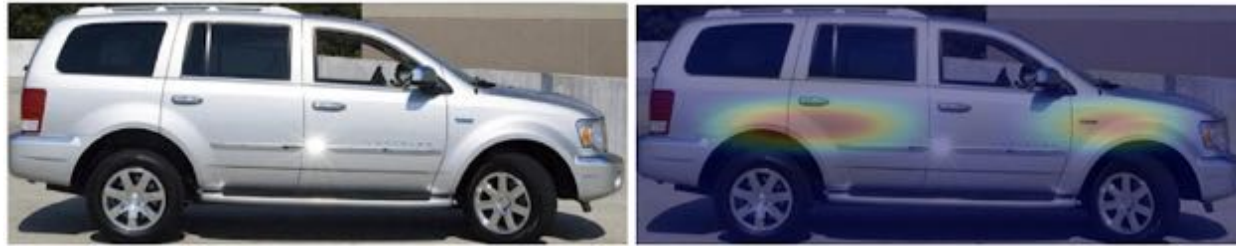

*Mark only one oval.*

- ☐ 1 - (least salient)
- ☐ 2
- ☐ 3
- ☐ 4
- ☐ 5 - (most salient)



39. How salient is the feature pointed out by the AI system? \*

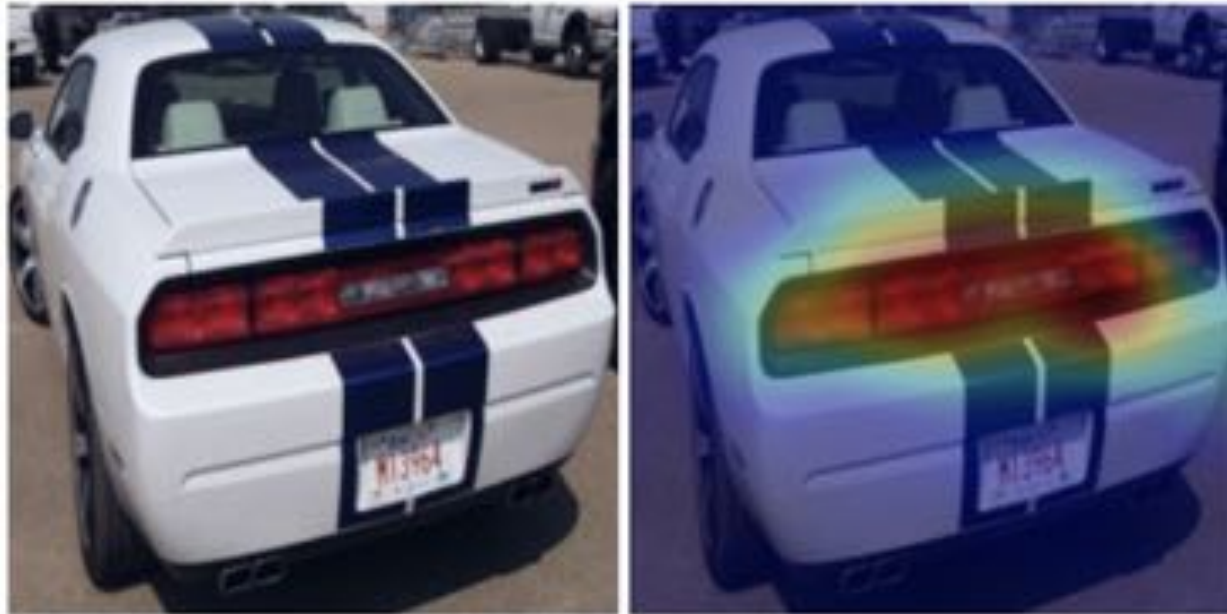

*Mark only one oval.*

- ☐ 1 - (least salient)
- ☐ 2
- ☐ 3
- ☐ 4
- ☐ 5 - (most salient)

40. How salient is the feature pointed out by the AI system? \*

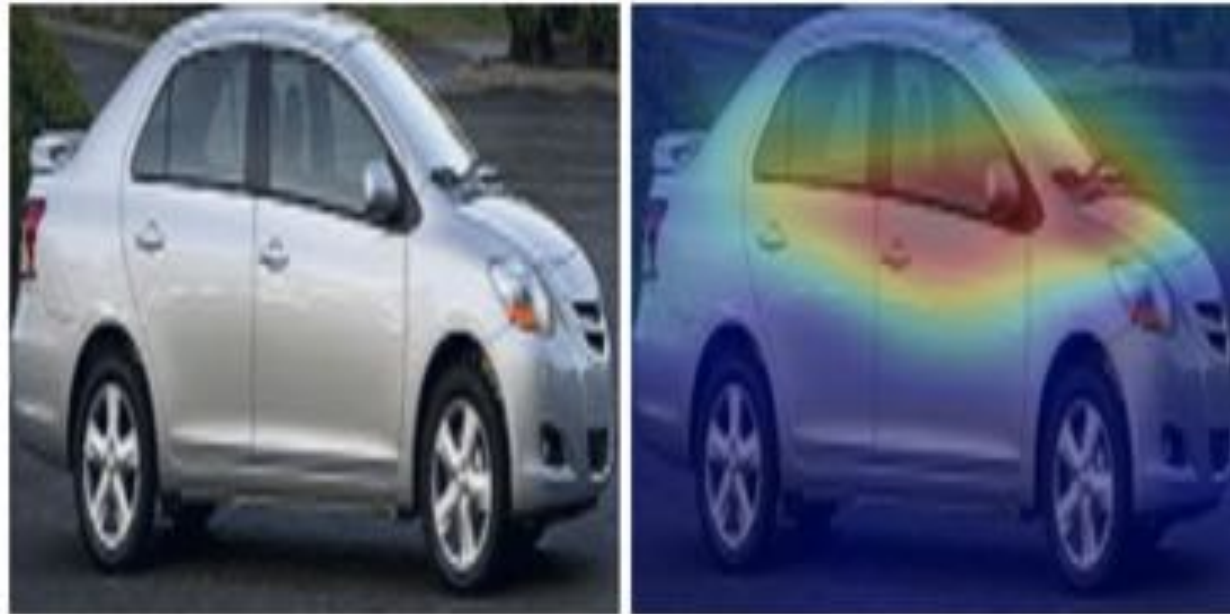

*Mark only one oval.*

- ☐ 1 - (least salient)
- ☐ 2
- ☐ 3
- ☐ 4
- ☐ 5 - (most salient)

41. How salient is the feature pointed out by the AI system? \*

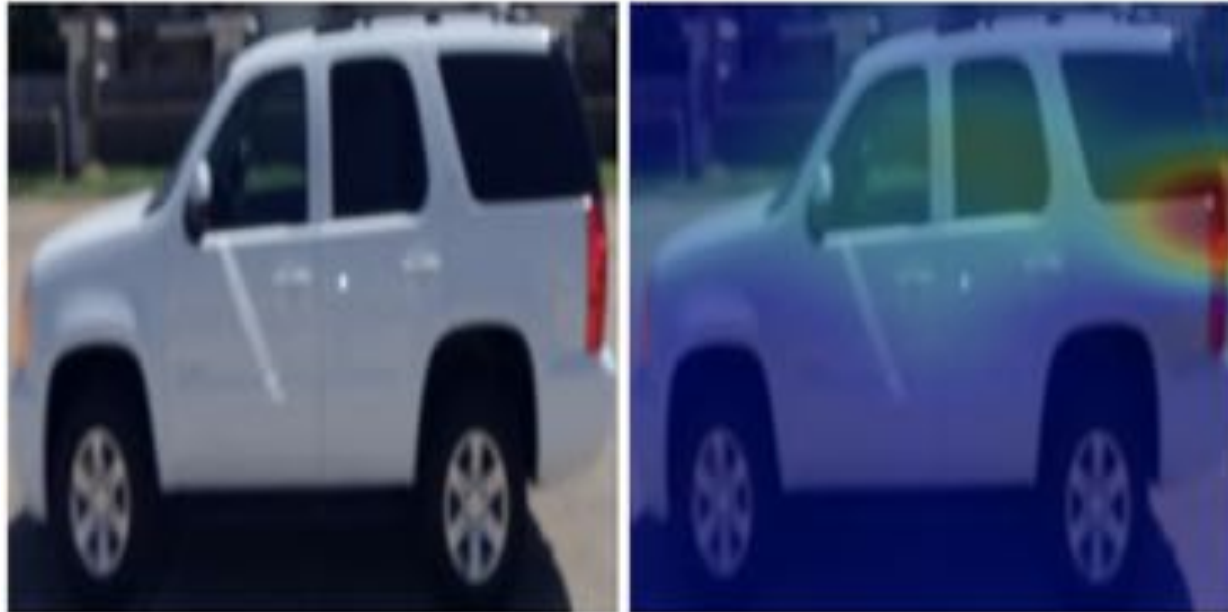

*Mark only one oval.*

- ☐ 1 - (least salient)
- ☐ 2
- ☐ 3
- ☐ 4
- ☐ 5 - (most salient)

42. How salient is the feature pointed out by the AI system? \*

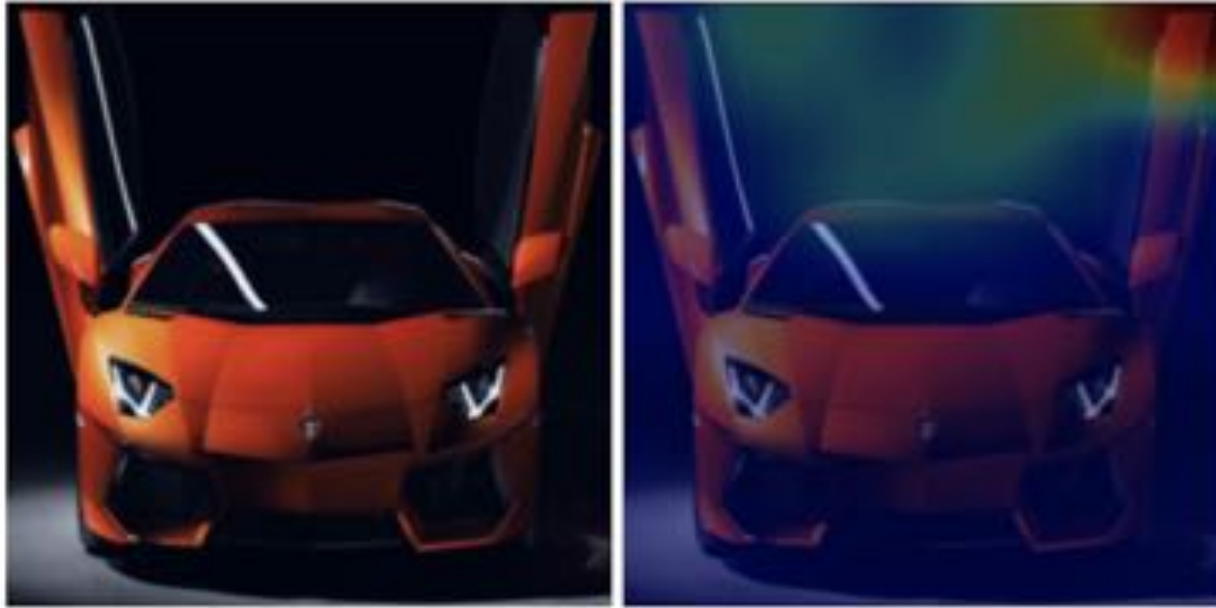

*Mark only one oval.*

- ☐ 1 - (least salient)
- ☐ 2
- ☐ 3
- ☐ 4
- ☐ 5 - (most salient)

43. How salient is the feature pointed out by the AI system? \*

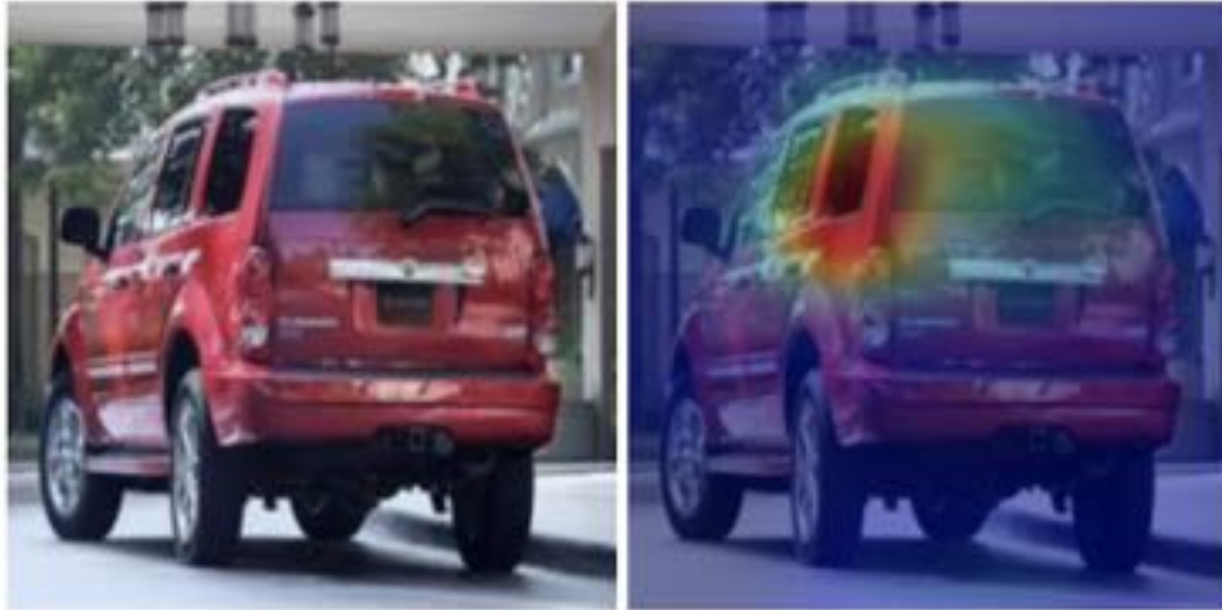

*Mark only one oval.*

- ☐ 1 - (least salient)
- ☐ 2
- ☐ 3
- ☐ 4
- ☐ 5 - (most salient)

44. How salient is the feature pointed out by the AI system? \*

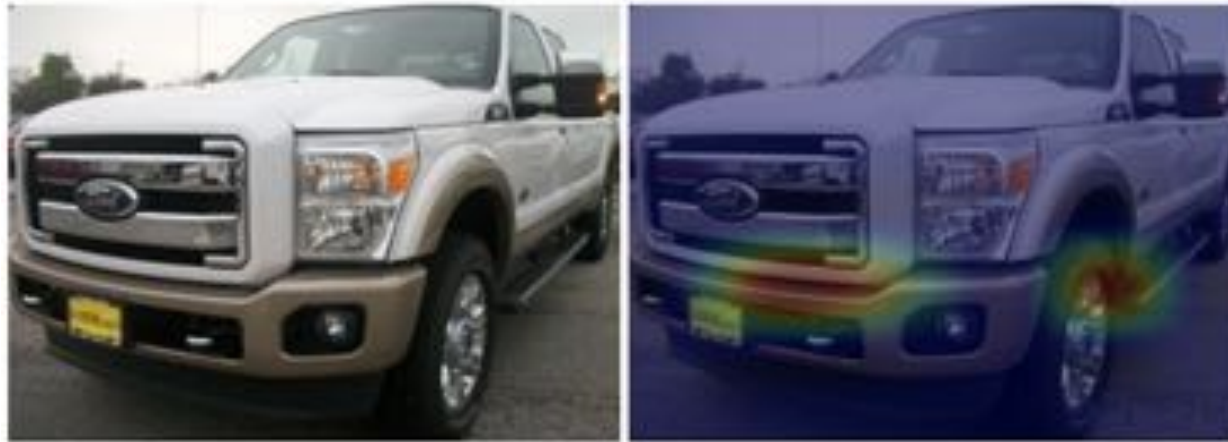

*Mark only one oval.*

- ☐ 1 - (least salient)
- ☐ 2
- ☐ 3
- ☐ 4
- ☐ 5 - I am sure that this feature is distinctive

45. How salient is the feature pointed out by the AI system? \*

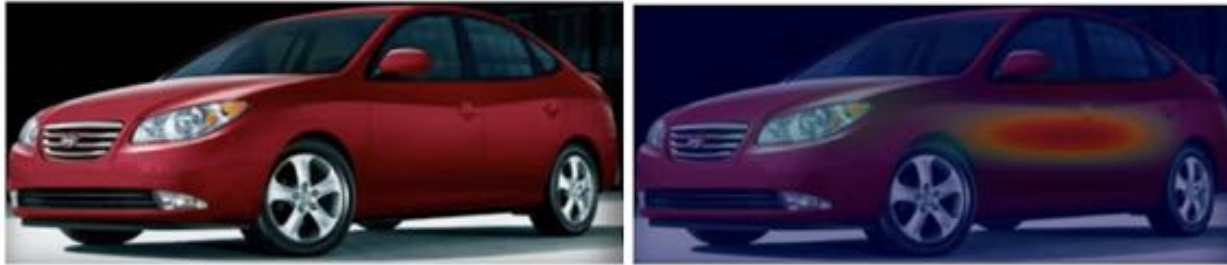

Mark only one oval.

- ☐ 1 - (least salient)
- ☐ 2
- ☐ 3
- ☐ 4
- ☐ 5 - (most salient)



46. How salient is the feature pointed out by the AI system? \*

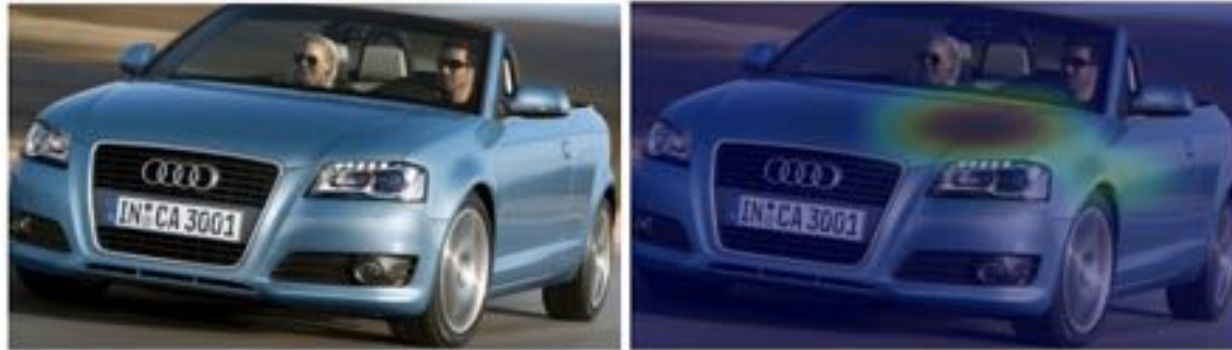

Mark only one oval.

- ☐ 1 - (least salient)
- ☐ 2
- ☐ 3
- ☐ 4
- ☐ 5 - (most salient)

47. How salient is the feature pointed out by the AI system? \*

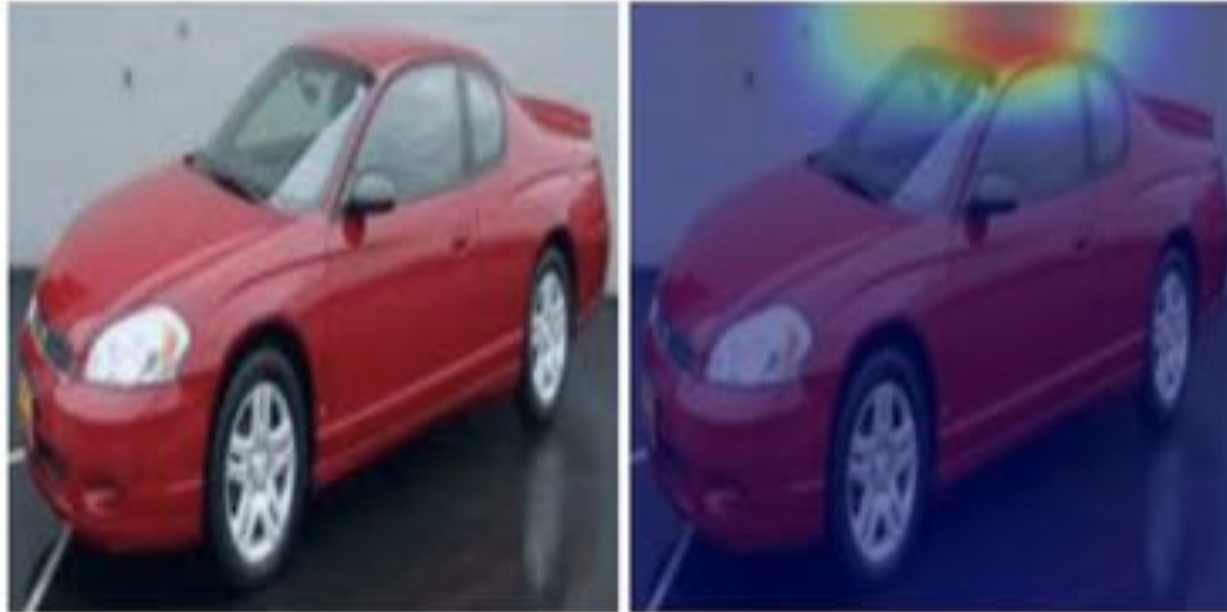

*Mark only one oval.*

- ☐ 1 - (least salient)
- ☐ 2
- ☐ 3
- ☐ 4
- ☐ 5 - (most salient)

48. How salient is the feature pointed out by the AI system? \*

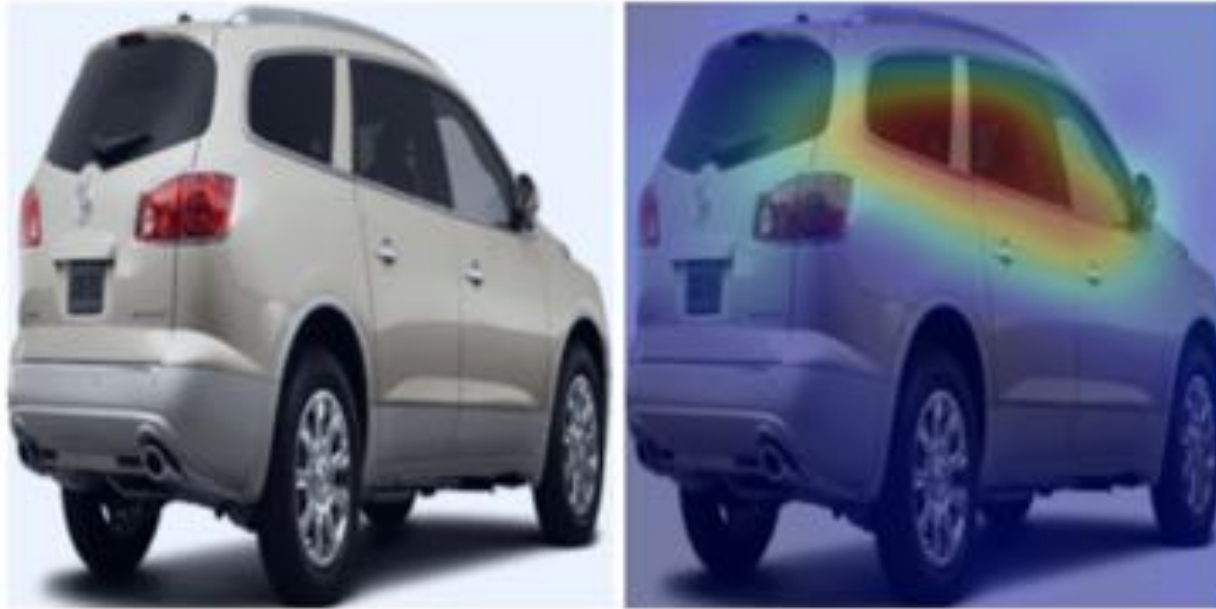

*Mark only one oval.*

- ☐ 1 - (least salient)
- ☐ 2
- ☐ 3
- ☐ 4
- ☐ 5 - (most salient)

49. How salient is the feature pointed out by the AI system? \*

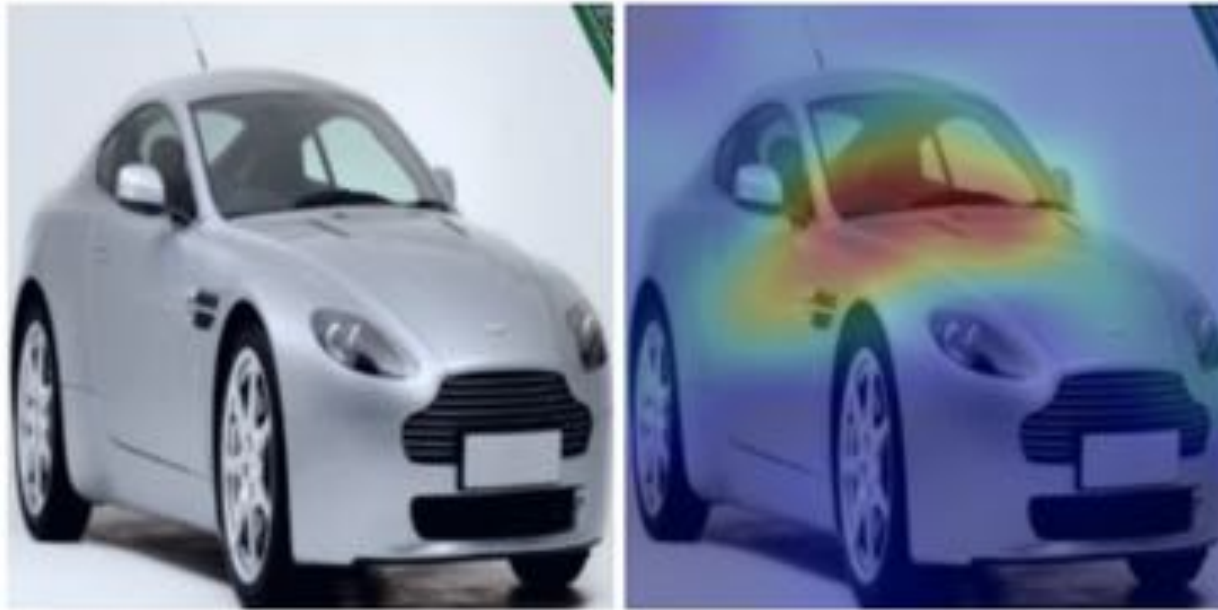

*Mark only one oval.*

- ☐ 1 - (least salient)
- ☐ 2
- ☐ 3
- ☐ 4
- ☐ 5 - (most salient)

50. How salient is the feature pointed out by the AI system? \*

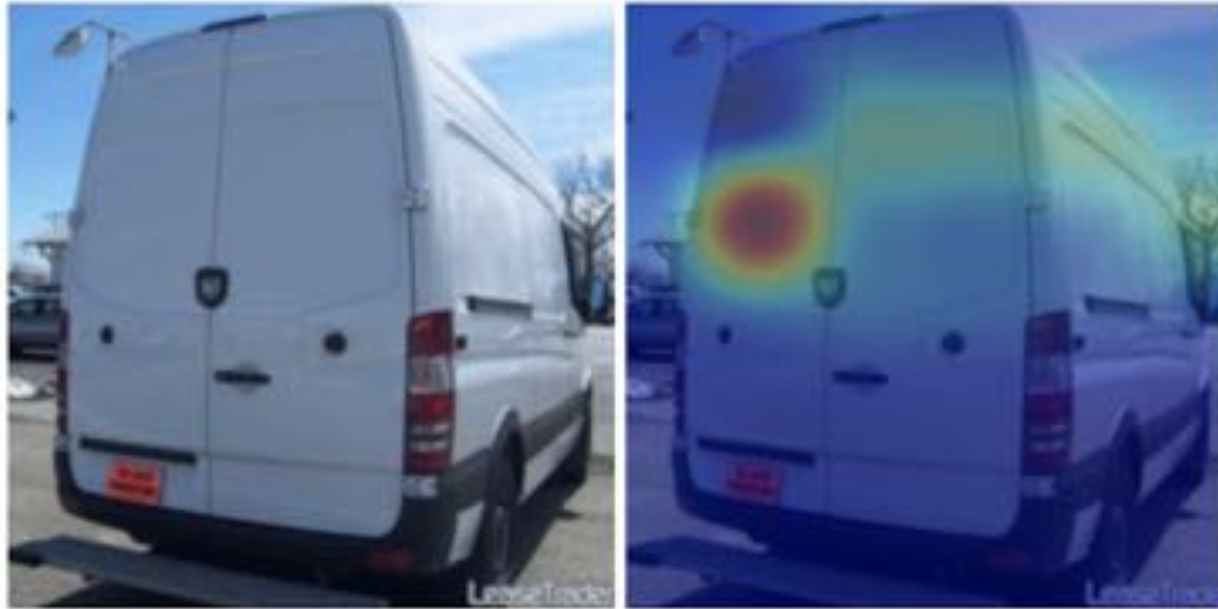

*Mark only one oval.*

- ☐ 1 - (least salient)
- ☐ 2
- ☐ 3
- ☐ 4
- ☐ 5 - (most salient)

51. How salient is the feature pointed out by the AI system? \*

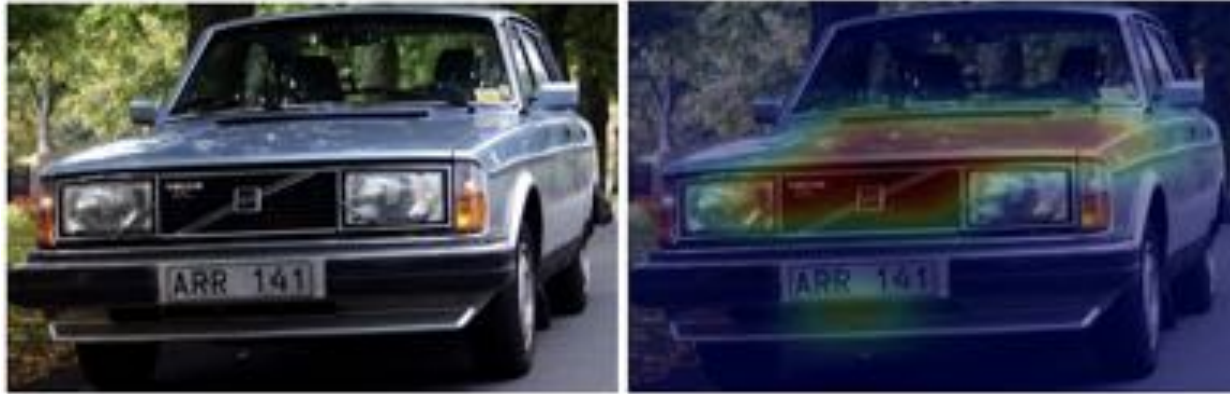

*Mark only one oval.*

- ☐ 1 - (least salient)
- ☐ 2
- ☐ 3
- ☐ 4
- ☐ 5 - (most salient)

52. How salient is the feature pointed out by the AI system? \*

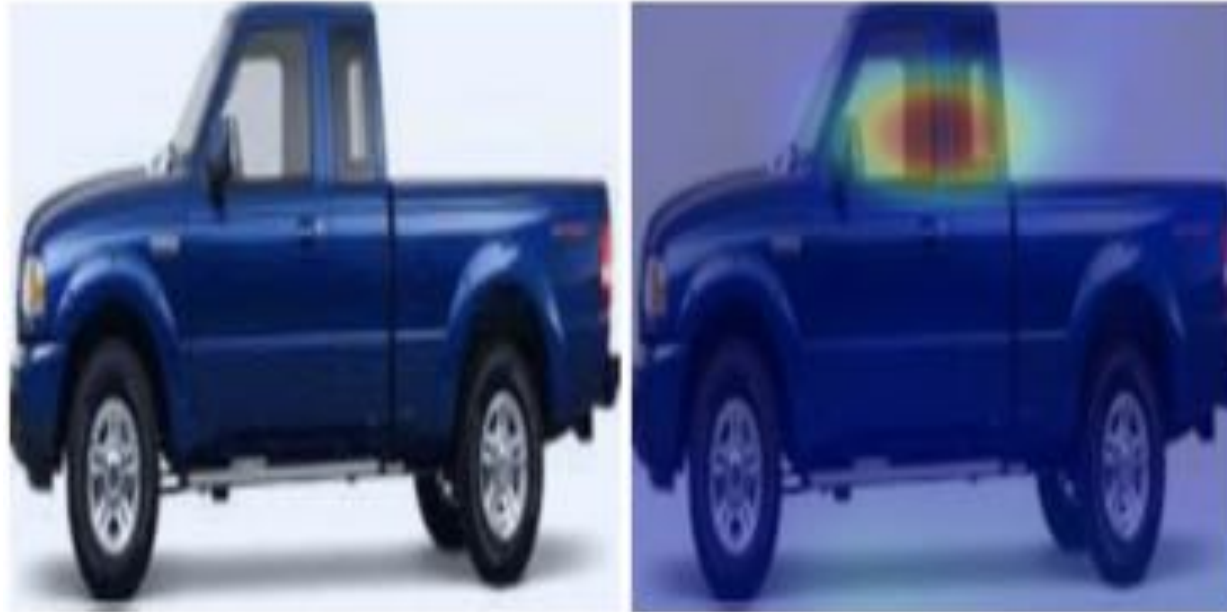

*Mark only one oval.*

- ☐ 1 - (least salient)
- ☐ 2
- ☐ 3
- ☐ 4
- ☐ 5 - (most salient)



53. How salient is the feature pointed out by the AI system? \*

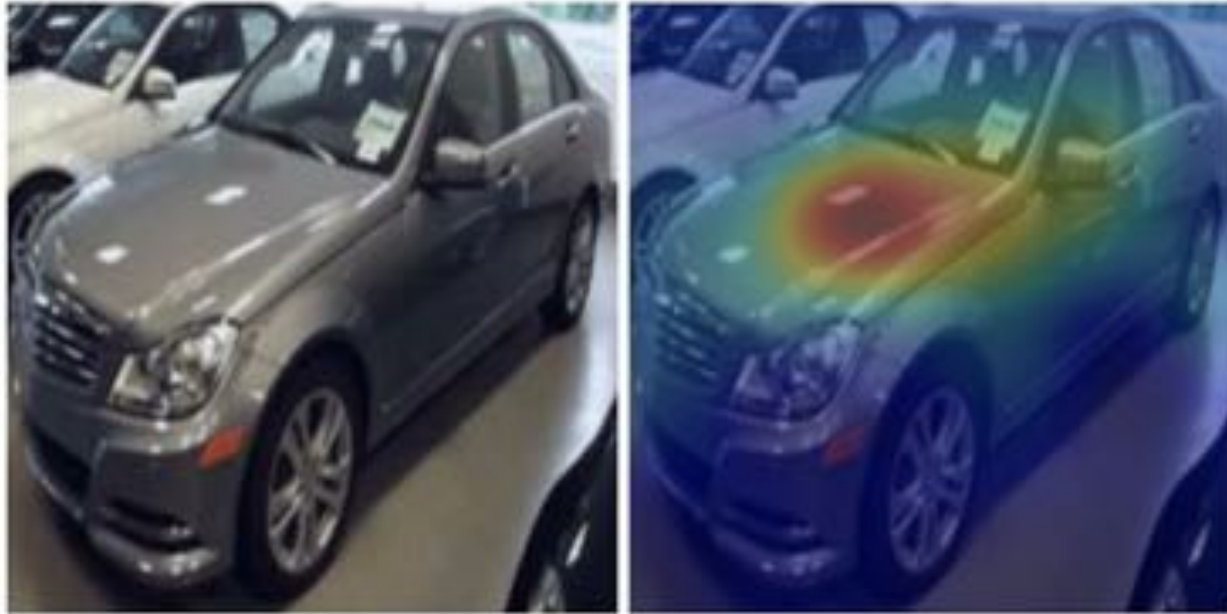

Mark only one oval.

- ☐ 1 - (least salient)
- ☐ 2
- ☐ 3
- ☐ 4
- ☐ 5 - (most salient)

54. How salient is the feature pointed out by the AI system? \*

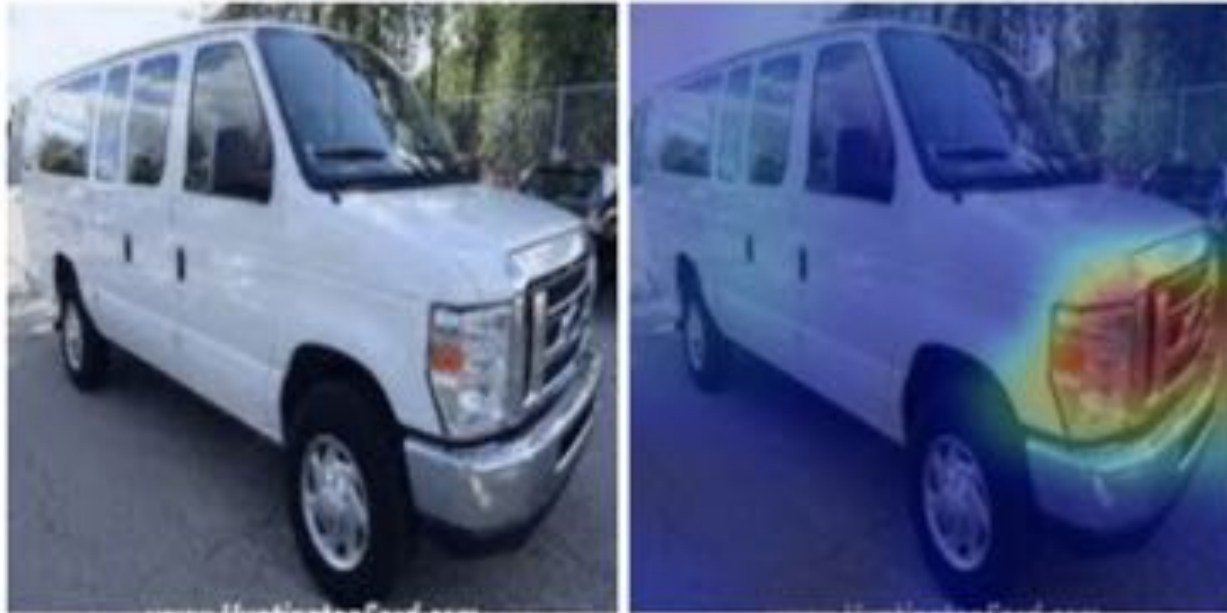

*Mark only one oval.*

- ☐ 1 - (least salient)
- ☐ 2
- ☐ 3
- ☐ 4
- ☐ 5 - (most salient)

55. How salient is the feature pointed out by the AI system? \*

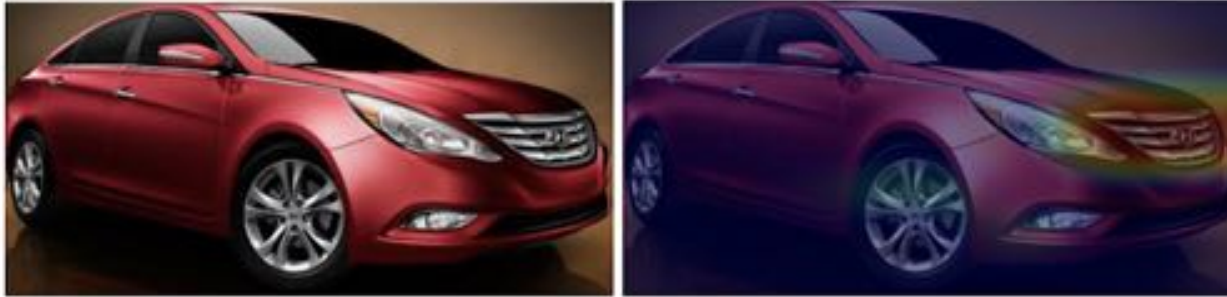

*Mark only one oval.*

- ☐ 1 - (least salient)
- ☐ 2
- ☐ 3
- ☐ 4
- ☐ 5 - (most salient)

56. How salient is the feature pointed out by the AI system? \*

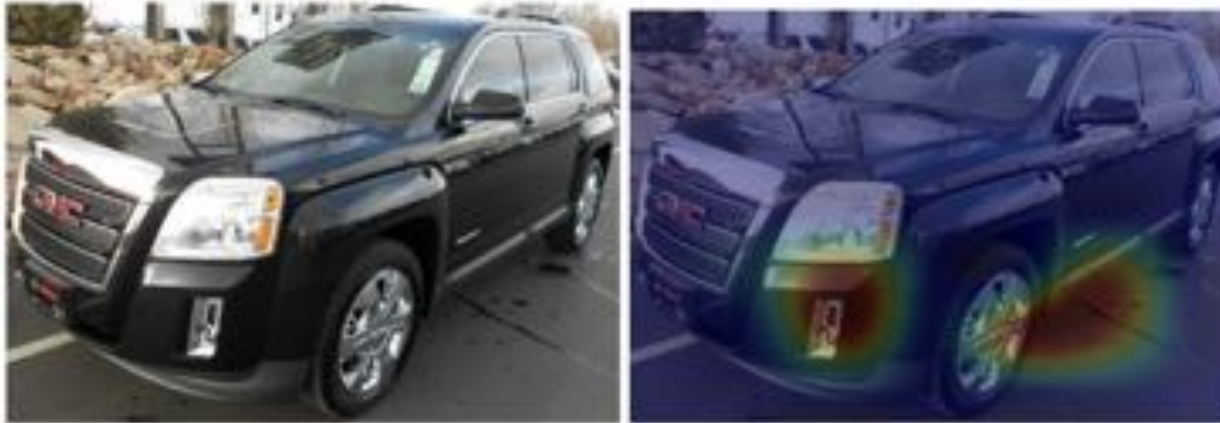

Mark only one oval.

- ☐ 1 - (least salient)
- ☐ 2
- ☐ 3
- ☐ 4
- ☐ 5 - (most salient)

57. How salient is the feature pointed out by the AI system? \*

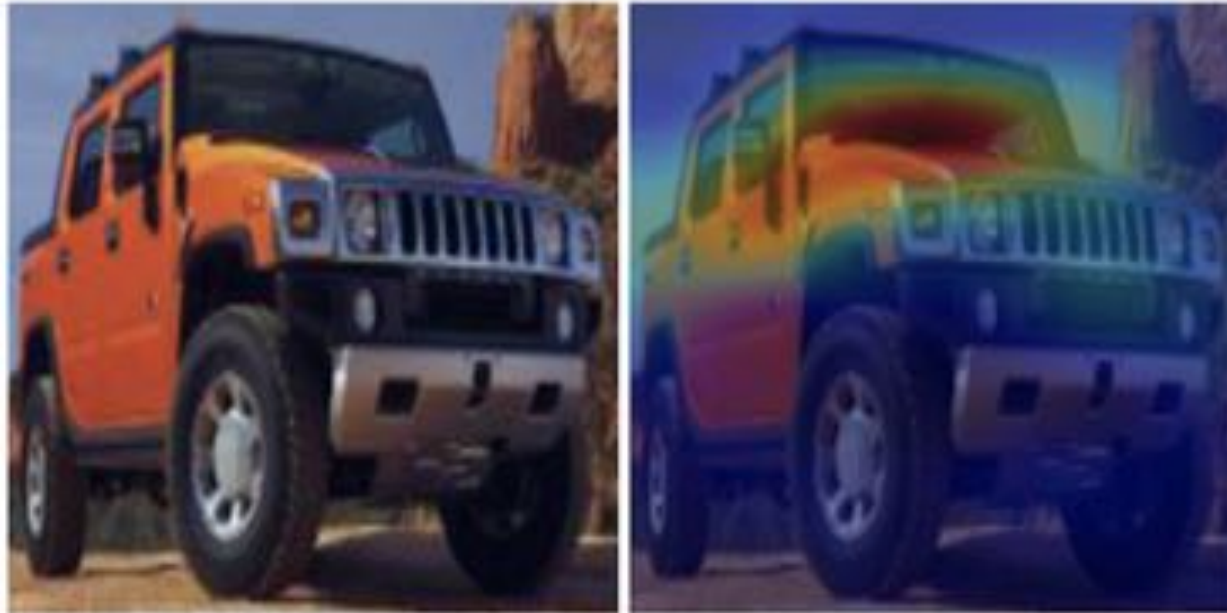

*Mark only one oval.*

- ☐ 1 - (least salient)
- ☐ 2
- ☐ 3
- ☐ 4
- ☐ 5 - (most salient)

58. How salient is the feature pointed out by the AI system? \*

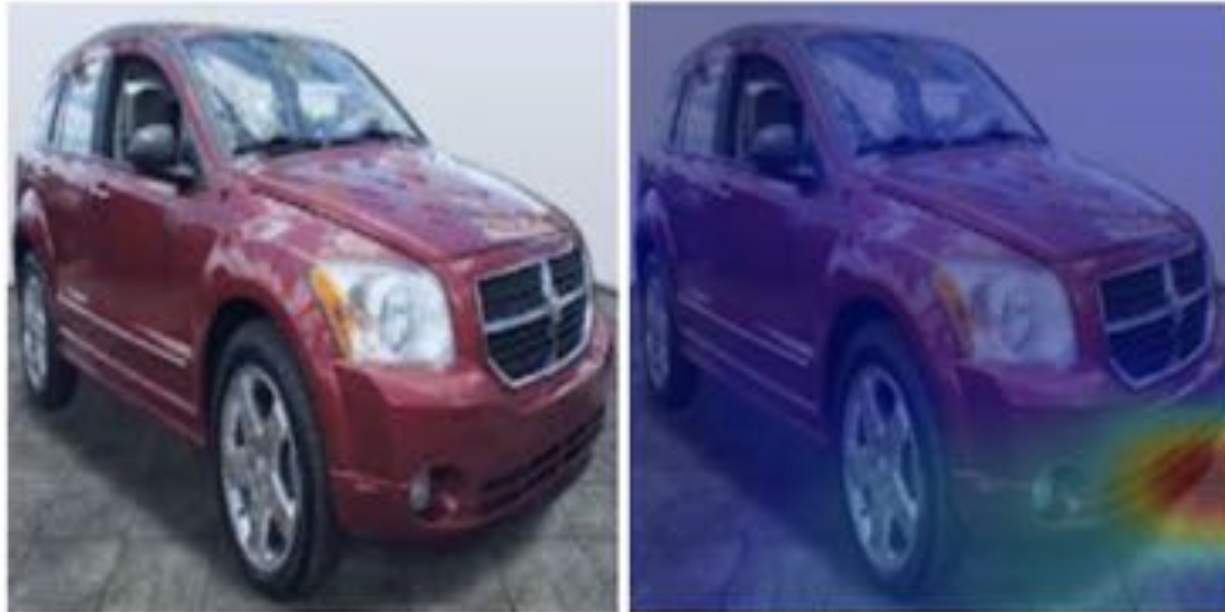

*Mark only one oval.*

- ☐ 1 - (least salient)
- ☐ 2
- ☐ 3
- ☐ 4
- ☐ 5 - (most salient)

59. How salient is the feature pointed out by the AI system? \*

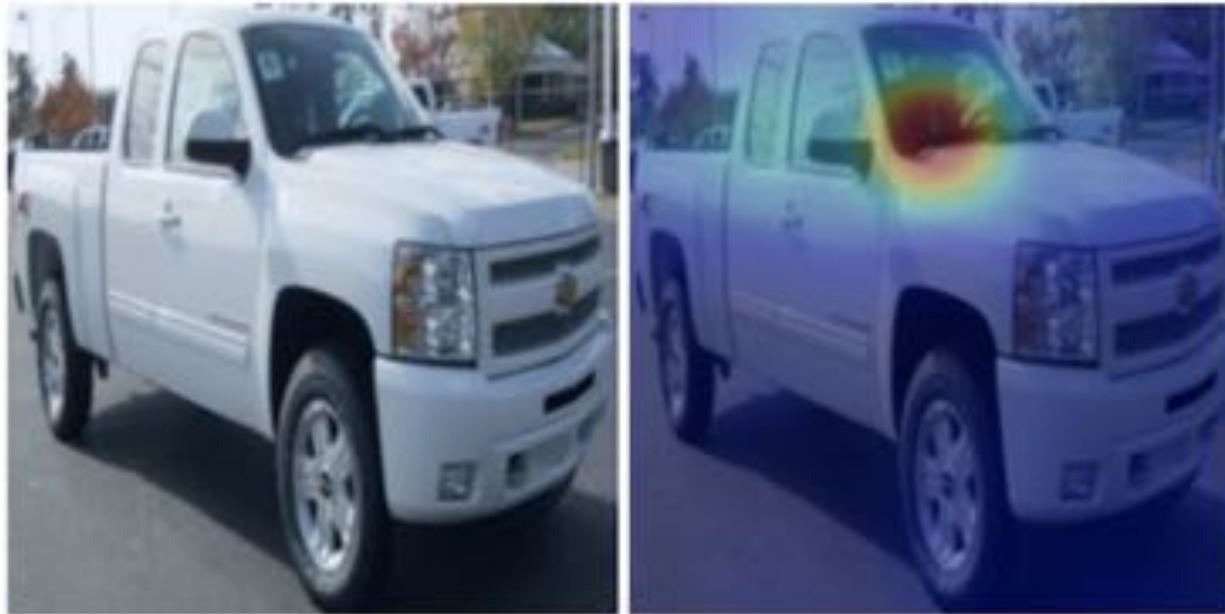

*Mark only one oval.*

- ☐ 1 - (least salient)
- ☐ 2
- ☐ 3
- ☐ 4
- ☐ 5 - (most salient)



60. How salient is the feature pointed out by the AI system? \*

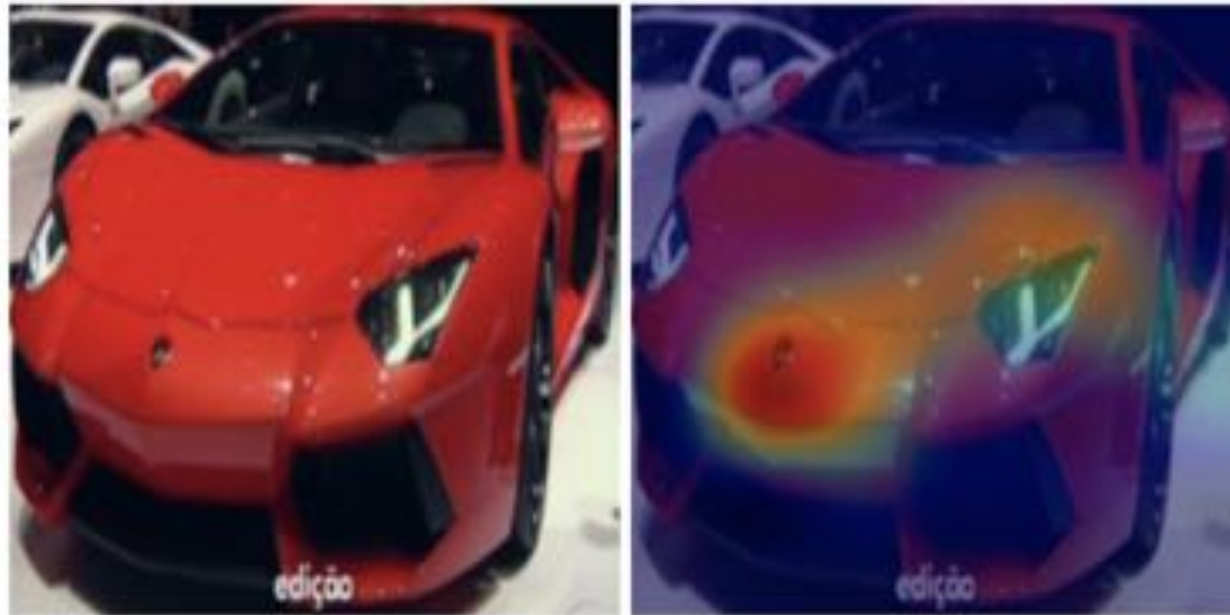

Mark only one oval.

- ☐ 1 - (least salient)
- ☐ 2
- ☐ 3
- ☐ 4
- ☐ 5 - (most salient)

61. How salient is the feature pointed out by the AI system? \*

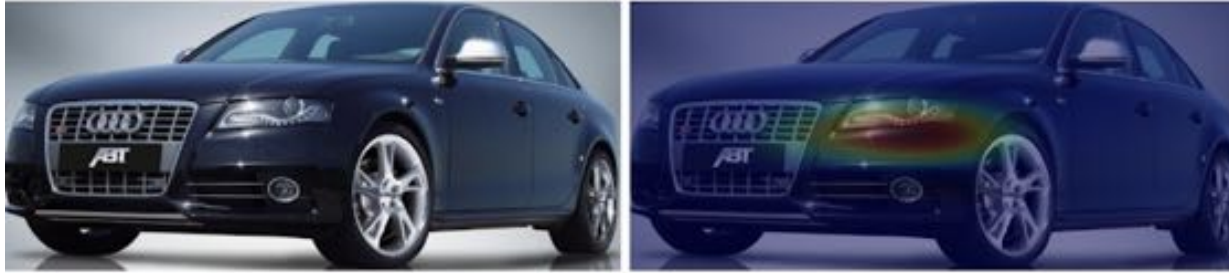

Mark only one oval.

- ☐ 1 - (least salient)
- ☐ 2
- ☐ 3
- ☐ 4
- ☐ 5 - (most salient)

Thank you very much for your answers!

---

This content is neither created nor endorsed by Google.

Google Forms
